# Supplementary material for: Data-driven probabilistic surrogate model for floating wind turbine lifetime damage equivalent load prediction
Source: Copernicus journal article supplement (doi:10.5194/wes-2025-24), 2025-02-21
Supplement: Supplementary file [file wes-2025-24-AC1-supplement.pdf]

# Authors' response

Dear Editors, Reviewers,

We deeply appreciate the thorough and constructive review of the article titled "Data-driven probabilistic surrogate model for floating wind turbine lifetime damage equivalent load prediction". The detailed comments of the reviewers are extremely useful and have significantly improved the quality of the paper. Here you will find the point-by-point response to the reviewer's comments in blue. The modified/added text is quoted in the reply in italics wherever necessary. The modifications in the submitted manuscript as a result of the reviewers' comments are highlighted in blue.

In addition to the reviewers' comments, we made the following minor changes in the manuscript:

- We noticed a typo in Equation (1) with a missing summation sign in the numerator, which has been updated in the text.
- A square exponent term was missing in Equation (6), which has been corrected.
- The convergence plots Figure 9a and Figure 9b are changed from log scale in the X-axis to linear scale in Figure 10a and Figure 10b as it seems to improve the readability and clarity for the reader. The contents of the plots have not been modified.

Best regards,

Deepali Singh, Erik Haugen, Kasper Laugesen, Richard P. Dwight, Axelle Viré

## Reviewer 1

***Q1.1** The manuscript discusses quite similar topics and uses similar methodologies as another recent manuscript by the same main author (<https://doi.org/10.5194/wes-9-1885-2024>, also cited in this paper). Please discuss what is the distinct methodological novelty of the present paper (see also my next comment).*

### Reply:

Indeed, the probabilistic machine learning framework used in this manuscript is the same as in the referenced article (<https://doi.org/10.5194/wes-9-1885-2024>). This was a deliberate decision following a thorough review of various machine learning methods for this application (Gaussian processes, conditional generative adversarial networks, chained Gaussian processes, artificial neural networks, among others). From the models we tested, Mixture Density Networks (MDNs) stood out as the most accurate, practical, and flexible. Although we do not present a comparison of different models in this paper, we would like to highlight that MDNs are particularly well-suited for probabilistic fatigue load modeling. The conditional response is often heteroscedastic and can be non-Gaussian, which the model can easily handle. In recent years, there has been a growing interest in Bayesian neural networks (as pointed out later), but we haven't evaluated it for load modeling yet. BNNs use variational inference, which can be computationally expensive, but it does allow for the separation of aleatoric and epistemic uncertainties. It would be interesting to couple BNNs with MDNs in the future to harness the advantages of both methods. We would like to highlight that the contribution of our work lies not in the ML architecture itself but in the application.

The novelty of this work is threefold:

### 1. Application of probabilistic data-driven model to Floating Offshore Wind Turbines (FOWTs):

The model is applied to FOWT DEL estimation, unlike our previous paper, where the scope was limited to fixed bottom cases. Not only are FOWT loads affected by the nonlinear dynamic behavior of the floating wind turbine, but also the underlying

40 simulations are much more complex, the stochastic hydrodynamic parameters have a bigger impact on the tower, the data is  
'noisier', the parameter space is larger, and thereby, the number of simulations is larger. This necessitates investigations into ro-  
bust surrogates. However, the literature on FOWT load modeling using probabilistic data-driven methods is currently limited to  
our understanding. Probabilistic data-driven models are generally validated on simpler cases. Complex cases are modeled using  
45 deterministic approaches, or with the assumption that the response is Gaussian or homoscedastic (Li and Zhang, 2019b, a). In  
this context, mixture models present a novel solution by addressing the limitations in the literature. They allow for uncertainty  
propagation, account for heteroscedasticity, and capture higher-order moments of the response distribution.

2. **Long-term probabilistic fatigue estimation with high-dimensional input:** For the lifetime fatigue estimation for FOWTs,  
the loads are calculated for a limited number of lumped sea states and statistically extrapolated to the lifetime loads by scaling  
50 them based on the probability of occurrence of the sea state. The number of variables is also limited, as the addition of a new  
variable exponentially increases the number of simulations needed for fatigue calculations. How to best choose the appropriate  
variables, sea states, and bin sizes to minimize errors in the extrapolated quantity is an open question (Papi and Bianchini,  
2024). In the second part of the article, we use the trained surrogate model to make probabilistic estimates of fatigue loads on  
all available historical site data for 25 years, bypassing the need for parametric joint distribution assumptions. An extension  
55 of this study could also be to model the parameters of the distributions defining the site conditions and propagate them to  
the loads. Such surrogates can also be used to identify interesting sea states and bin sizes that minimize the deviation of the  
extrapolated fatigue compared to the reference, where all available site data is used.

3. **Insight into variance in long-term fatigue:** We demonstrate that due to the law of large numbers, the influence of ran-  
dom seeds on long-term tower load estimation diminishes significantly over a 25-year period, even with 500 seeds (from the  
60 surrogate). This indicates that stochastic inflow conditions contribute minimally to uncertainty in long-term fatigue predictions.

As both reviewers noted, the novelty of the work is not clearly presented in the introduction. Therefore, we have modified  
65 the introduction to separate it into "Background", "Previous work on probabilistic data-driven modeling for wind turbine load  
estimation", and "Research objectives". A brief overview of the surrogate modeling task is added to the Background section,  
instead of the end of the section. The research objective now reiterates the novelty of the work on page 5, line 425. The exact  
text is copied here for reference:

70 *"The objectives of this work are threefold:*

- *To apply and evaluate a probabilistic machine learning model (MDN) for predicting short-term fatigue loads in floating offshore wind turbines:  
Not only are FOWT loads affected by the nonlinear dynamic behavior of the floating wind turbine, but also the under-  
lying simulations are much more complex, the stochastic hydrodynamic parameters have a bigger impact on the tower,  
75 the data is 'noisier', the parameter space is larger, and thereby, the number of simulations is large. This necessitates  
investigations into robust surrogates. Probabilistic data-driven models are often validated on simpler cases. Complex  
cases are modeled using deterministic approaches, or with the assumption that the response is Gaussian or homoscedas-  
tic. Using a mixture model effectively solves many of the gaps in the literature by propagating uncertainty, including  
heteroscedasticity, and modeling higher-order moments.*
- 80 – *To demonstrate that such a model can provide insights into long-term probabilistic fatigue estimation, especially in high-  
dimensional spaces where traditional binning approaches become computationally restrictive:  
The lifetime fatigue estimation for FOWTs involves additional complexity, including the joint distribution of metocean  
conditions and sensitivity to bin sizing. These issues are exacerbated by the exponential growth in simulation cost with  
each added dimension. A surrogate model enables direct use of historical site condition data, bypassing the need for  
85 parametric joint distribution assumptions.*

– To investigate the impact of stochastic variability in site conditions on fatigue prediction over long time spans: We select four potential floating wind sites with similar water depths and use the surrogate model to estimate probabilistic lifetime fatigue loads. We investigate the effect of accounting for the stochastic variability in the 10-minute loads relative to the variation in site conditions. It is demonstrated that due to the law of large numbers, the influence of random seeds on long-term tower load estimation diminishes significantly over a 25-year period, even with 500 seeds (from the probabilistic surrogate). This indicates that stochastic inflow conditions contribute minimally to uncertainty in long-term fatigue predictions.

By addressing these points, this work contributes a validated, flexible surrogate modeling framework that accounts for the complexities of floating wind systems, advancing the state of probabilistic load modeling in floating offshore wind research."

95 **Q 1.2** As with most surrogate modelling approaches, this one is specific to the model which has been used to run the simulations. This limits the direct applicability of the trained model to just the turbine configuration in question. As a result, the primary scientific contribution of a surrogate modelling paper is normally in the methodology (or some specific findings from the results) rather than the end product. I recommend that the authors clarify what is the methodological contribution in this paper, or highlight some important findings that warrant the publication.

100 **Reply:** Agree with this recommendation. Based on this comment and comment number 4, we have added a discussion section to list the key takeaways of this study, which also includes some comments on the limitations and advantages of using MDNs. Since the focus of the work is not the ML architecture itself, we have not made any changes to the methodology section.

**Q 1.3** Bayesian Neural Networks (BNNs) are another approach to train a heteroscedastic model without the need of making repetitions. The authors may want to mention this and cite e.g. Hlaing et al. (<https://doi.org/10.1177/14759217231186048>)

105 **Reply:** Thank you for sharing this article. It has been added to the literature review section in the introduction on page 5, line 404.

The added text is copied here for reference:

110 *Heteroscedastic probabilistic data-driven modeling has been further explored using Bayesian neural networks (BNNs) for estimating loads on non-instrumented wind turbines using information from fully-instrumented counterparts (Hlaing et al., 2024). Preliminary studies on fatigue load prediction using BNNs show promising results on onshore wind turbines (Omole et al., 2021). BNNs are a powerful class of neural network architectures that assign probability distributions to the network weights and biases, effectively allowing the separation of aleatoric and epistemic uncertainties.*

**Q 1.4** I am missing a discussion section, which may include thoughts on the limitations of the current study.

115 **Reply:** Agreed, a discussion section has now been included, page 29, line 833.

The exact text is quoted here for reference:

## 5.2 Discussion and future work

120 *This section provides a critical discussion of the study's results, along with practical considerations and limitations associated with the use of MDNs.*

### 5.2.1 10-minute conditional DEL prediction

125 *Given the stochastic nature of the site conditions, it is natural to model the 10-minute DEL response within a probabilistic framework. MDN is demonstrated in this study to be a reliable tool for modeling the conditional distribution of 10-minute DELs on the spar buoy floating wind turbine's tower and blades. MDN predictions are shown to remain robust across different network architectures and numbers of mixture components. The conditional means of the DELs are predicted with high*

accuracy, achieving an  $R^2 = 0.99$ . Additionally, the Wasserstein distance between the predicted and reference conditional distributions shows a strong match at the blade roots and tower top. However, at the tower bottom, the conditional standard deviation of the 10-minute fore-aft DEL is consistently over-predicted. It is corroborated by the relatively larger normalized Wasserstein distance value, indicating a bigger difference between the reference and predicted pdfs. Two main factors contribute to this: (i) the reference BHawC distributions are not converged at all simulated test locations with 44 random seeds. The tails of some distributions are not developed, resulting in short-tailed distributions that the MDN cannot easily capture; and (ii) the tower bottom fatigue is shown in the literature to have a stronger correlation to the hydrodynamic parameters, leading to higher noise in the data. As MDN is trained to minimize the negative log-likelihood, it is rewarded for predicting higher variance when there is less confidence.

### 5.2.2 Probabilistic lifetime DEL aggregation

The uncertainty in the aggregated lifetime fatigue loads due to stochastic inputs is found to be much smaller in scale compared to the mean. This results from summing the 10-minute DELs over a million occurrences, effectively nullifying the impact of the outliers. The use of a probabilistic surrogate that correctly captures the conditional distribution is still useful, as it minimizes the aggregation of error in the final response.

### 5.2.3 Notes on mixture density networks

Mixture density networks, due to their flexibility in modeling the conditional response, are well-suited for the problem of probabilistic load estimation. One big advantage of the method is the ease of implementation and robustness, as demonstrated in this paper. Compared to deterministic models that often assume a Gaussian response to determine the conditional mean, mixture models can account for skewness and multimodality, and improve the mean estimates. This is especially important for quantities like DELs, which may have non-Gaussian, heteroscedastic variations. MDNs scale well and are cost-effective to train compared to models that use Bayesian inference or variational inference (Blei et al., 2017).

MDNs without regularization can result in overfitting. Therefore, in this study, both L1 and L2 regularization are implemented. Secondly, MDNs rely on a stochastic optimizer that is sensitive to the initialization of the model parameters. Hence, a 10-fold cross-validation is recommended to ensure the optimizer is not stuck on a false minimum. As seen in the tower-bottom fore-aft channel, minimizing the negative log-likelihood can result in the over-prediction of the standard deviation of the conditional response when the underlying distribution is short-tailed. MDNs here are not restricted to strictly positive values; in some cases, the tails may also extend to negative values. A potential solution is to assume a lognormal distribution for the output. This can be done by directly predicting the parameters of a lognormal distribution during training or by transforming the output to a normal distribution before training.

**Q 1.5** References style: many references seem to introduce repetitions, such as e.g., “Zhu et al. (Zhu and Sudret, 2020) on line 65. If the authors use the citep command to refer to a paper, they don’t need to repeat the author names in the text as they come automatically from the LaTeX command.

**Reply:** Thanks, this has been fixed throughout the document now.

**Q 1.6** Simulation time of 600s seems quite short for floating wind with low-frequency response. This may affect especially the estimation of higher-order moments of the response and may be important for this study, which explicitly considers higher-order statistics.

**Reply:** 10-minute simulations are considered sufficient according to the IEC standards for floating wind fatigue calculations on the tower and blades, and are the standard at Siemens Gamesa for this wind turbine type. It is also in line with an extensive study by Haid et al. (Hai, 2013), where the fatigue on the wind turbine tower and blades is more sensitive to whether the half-cycles are calculated than to the total duration of the simulation. Nevertheless, the optimal length of the simulation for floating wind turbines should be looked into in more detail by the research community, as the responses can be foundation-dependent. The surrogate model presented here is based on the current standards and is expected to evolve as the certification requirements

175 evolve. Some other components, such as the mooring lines, are more sensitive to low-frequency cycles due to their low natural frequencies and require longer simulations to capture relevant load variations. However, they are not in the scope of this article.

180 *Q1.7 Section 3.2.1: The authors suggest the R-squared between the mean and the standard deviation predictions of the distribution as a goodness-of-fit metric. This limits the representativeness of the comparison as it doesn't allow comparing higher distribution moments. Also, the R-squared is not sensitive to bias. The other metric proposed by the authors, the Wasserstein distance, is not limited in this way. Is the R-squared then redundant? Results shown in Table 9 may hint at that, since it is only the dw2 that flags the tower bottom FA model as having worse performance than the other three channels.*

185 **Reply:** The  $R^2$  value of the conditional mean is a simple and widely used metric that provides a reference for how good the model is in predicting the "most likely" value of the response. It is especially useful if one wants to compare it to other deterministic models that generally would only predict the conditional mean. As noted,  $d_{W2}$  is introduced for a holistic comparison of the response. For the tower bottom fore-aft moment, the difference in the output of the two parameters is interesting because it indicates that even if the exact conditional distribution is not as accurately predicted as the other channels, the conditional mean is still well captured. One of the limitations in the setup is that BHawC only has a limited number of seeds, so the reference distribution is not fully converged either. It is more evident in the case of the tower bottom fore-aft moment, where the distributions in many cases are very short-tailed. The high  $d_{W2}$  values are also affected by the non-converged reference distributions. Since the mean converges faster than the higher-order moments,  $R^2\mu$  is not as affected.

195 *Q1.8 Page 23, line 428: the authors state "Including these additional uncertainties in the feature set would likely increase the variance of the final load estimates.". I agree with this, but I think some nuance needs to be added. The uncertainties that are propagated through the fatigue model will not necessarily increase the variance of the short-term outputs, they may introduce bias in the long-term mean which will manifest as an uncertainty in the long-term (aggregated) statistics of the outputs. For example, assuming a higher annual mean wind speed will lead to a bias in the mean estimate of total accumulated fatigue damage.*

**Reply:** Agree with this, the text has been modified in page 27, line 789.

200 The exact text is quoted here for reference:

*Including these additional sources of uncertainties may introduce bias in the long-term mean, which is reflected as an uncertainty in the aggregated statistics of the outputs.*

## Reviewer 2

205 *Q2.1 Clarify the novelty with respect to your previous paper on Wind Energy Science. It seems that the only change is the database, while the methodology is the same.*

**Reply:** Based on this and the previous reviewer's comment on the clarity of the novelty of the work (Q1.1), more information has been added to the introduction on page 5, line 425.

*Q2.2 I'm not convinced by the testing set, since it's quite specific instead of random.*

210 **Reply:** The test locations for some variables, like yaw misalignment and power law exponent, were chosen to be specific values based on user requirements at the time the database was being generated. We agree that, in hindsight, random sampling of all the parameters would be a fairer way to judge the performance of the surrogate. Unfortunately, creating a new test dataset is no longer possible for this study, but we do acknowledge your comment and have added a section in the text recommending

random sampling for testing in the future, page 15, line 595.

215 The exact text is quoted here for reference:

*For future studies, jointly sampling the test points across all variables is recommended for a fairer evaluation of the surrogate's performance throughout the domain.*

220 **Q 2.3** *The literature review is well done. Have you found any paper on Bayesian neural networks? Not necessarily from wind. I'm only aware of a report from the HIPERWIND project.*

**Reply:** Thank you. We haven't looked much into BNNs, but based on the recommendation of the other reviewer, we have added a reference now to the literature review about two BNN papers by Hlaing and Omole, page 5, line 404.

**Q 2.4** *I had troubles following the hyper-parameters tuning between the main text and the appendix. Some restructuring would be appreciated.*

225 **Reply:** We had decided it was necessary to move the hyperparameter tuning section to the appendix to limit the length of the article as it was getting too long.

**Q 2.5** *Which library have you used to train the MDN?*

230 **Reply:** We have used tensorflow probability (<https://www.tensorflow.org/probability>) for modeling MDNs. The output layer is modeled using a mixture normal implementation that can be found here: [https://www.tensorflow.org/probability/api\\_docs/python/tfp/layers/MixtureNormal](https://www.tensorflow.org/probability/api_docs/python/tfp/layers/MixtureNormal).

**Q 2.6** *Specify the names of the time-domain simulation tools.*

**Reply:** The names of some of the commonly used engineering tools are added on page 2, line 335.

The exact text is quoted here for reference:

235

*The calculations are typically made using time-domain multi-physics engineering tools like OpenFAST (Jonkman, 2013), HAWC2 (Larsen and Hansen, 2007), and BHawC (Couturier and Skjoldan, 2018; Skjoldan, Peter Fisker, 2011)*

**Q 2.7** *Space between the number and the unit.*

240 **Reply:** A space has been introduced between the number and the unit throughout the document. Perhaps this will be standardized during the typesetting phase by the journal.

**Q 2.8** *"The inflow turbulence is modeled using a spatially varying frozen wind field based on the Mann model." Have you tried using the hipersim turbulence generator?*

**Reply:** We only used the internal SGRE turbulence box generator for this study to keep in line with the company standards. Thanks for sharing the hipersim package, it's definitely worth looking at in the future, also within the industrial context.

245 **Q 2.9** *"The structural elements are modeled using the co-rotational formulation providing geometric nonlinearity." I was expecting to read equilibrium based formulation by Philippe Couturier*

**Reply:** The co-rotational formulation is modeled to capture geometric non-linearities, while the beam elements are modeled with a variable cross-section equilibrium formulation introduced by Coutourier. The reference to the beam model by Coutourier is added on page 9, line 483.

250 *Q 2.10 Mention the curse of dimensionality.*

**Reply:** This has been added to the text on page 10, line 500.

*Q 2.11 Addition of Winds to Loads paper by N. Dimitrov that uses Sobol indices.*

**Reply:** The article has been added to the list on page 10, line 507.

*Q 2.12 Formatting  $U_{ref}$ ,  $I_{ref}$ ,  $n_{ref}$ ,  $W_{dir}$ ,  $z_{ref}$ ,  $V_{hub}$  to remove italic subscript.*

255 **Reply:** The variable notation has been replaced to  $U_{ref}$ ,  $I_{ref}$ ,  $n_{ref}$ ,  $W_{ref}$ ,  $w_{ref}$ ,  $V_{hub}$  throughout the document.

*Q 2.13 Including the tower bottom side-side moment*

260 **Reply:** Only the fore-aft moment was included as the magnitude of fatigue in this direction is much larger than side-side. However, it could be interesting for sites with large wind-wave misalignment. The side-side moment may potentially be more difficult to model with a surrogate, as there is no aerodynamic damping of loads. Perhaps it is interesting to test the limits of the surrogate and should be included in future investigations.

*Q 2.14 Non-dimensionalizing the DEL values*

**Reply:** The value of the DELs could not be shared publicly, so we decided to non-dimensionalize it using the Z-score/ standard scaler. This is now added to the text on page 11, line 534.

*Q 2.15 What is the local coordinate system?*

265 **Reply:** The local coordinate system here refers to the coordinate system of the individual component as defined in the BHawC tool and not a fixed location in the domain. But indeed, more information would be useful if we were sharing absolute load values.

*Q 2.16 Formatting of new lines after equations.*

**Reply:** The space has been removed before the beginning of the line following an equation throughout the paper.

270 *Q 2.17 Instead of fitting lower and upper bound, and then using a uniform distribution, you could have fitted these measurements with a multivariate distribution. For example, a n-dimensional normal with correlated inputs. It's quite easy with both SciPy and OpenTURNS, and you might rank which distribution performs best using the maximum likelihood.*

275 **Reply:** Agree, fitting a multivariate distribution and then sampling as an alternate approach preserves the marginal distribution and doesn't require an arbitrary choice of feature bounds. We have added your suggestion as an alternate approach for the reader on page 14, line 584. Thanks a lot for referencing the Python libraries. We will note it for future investigations. Thanks also for introducing scrambling and the advantage of using Halton sequencing over Sobol.

The exact added text is copied here for reference:

280 *Alternatively, a multivariate distribution fitting the available data can be used to define the sampling space bounds.*



*Q 2.18 Should the wave direction be correlated to the wind direction?*

**Reply:** It is certainly correlated to the wind direction. In this case, we are not including wind direction as an input parameter, assuming the rotor is always facing the wind. So, essentially, the wave direction acts as the wind-wave misalignment angle. For floating wind loads, it is considered an important parameter, and because we wanted the model to learn to predict loads at any misalignment angle, we decided to sample it uniformly.

*Q 2.19 Please cite your previous paper with the formulas.*

- In general, during training it helps normalizing the input and output, but it looks like here it's even more important, or you'll get a floating point overflow when computing the std. How have you normalized the database? - The softmax function can easily overflow. Are you using the trick by Nick Higham to prevent it?

**Reply:** The previous paper is now cited in the methodology section. The data is normalized using the standard scaler/ Z-score. We have not checked if the fit changes by using the trick of subtracting  $\max(x)$  from  $x_i$  to prevent overflow. At least in this example, we did not encounter an overflow situation, but it is definitely something to investigate further to prevent it from happening.

*Q 2.20 How are you optimizing the hyperparameters?*

**Reply:** In this case, we only checked the performance by manually tuning selected hyperparameters. We have not looked into Optuna yet. It is a good suggestion as the number of hyperparameters grows.

*Q 2.21 Why are the number of layers and nodes in a separate table?*

**Reply:** This is to name the models with different node numbers and link them to the convergence plots in the results section.

*Q 2.22 Number of mixture components*

**Reply:** In most cases, the response does look Gaussian, but for instance in Figure 12c, the distribution is better represented with some skewness. This is only possible if we use more than one Gaussian component. Perhaps 2 or 3 components would also suffice, but having more does not necessarily increase the training cost by much while making sure there are enough parameters available to model any kind of response. In the previous paper on fixed-bottom wind turbines, we encountered multi-modal output where one component would not have captured the response correctly.

*Q 2.23 Choice of feature bounds*

**Reply:** The feature bounds are just arbitrary functions defined using trial and error, that encapsulate the observed site data. This is only an example, and perhaps using a multi-variate distribution as you suggested is a better approach to define the bounds.

## Data-driven probabilistic surrogate model for floating wind turbine lifetime damage equivalent load prediction

Deepali Singh<sup>1</sup>, Erik Haugen<sup>2</sup>, Kasper Laugesen<sup>2</sup>, Richard P. Dwight<sup>1</sup>, and Axelle Viré<sup>1</sup>

<sup>1</sup>Delft University of Technology, Kluyverweg 1, 2629 HS Delft, The Netherlands

<sup>2</sup>Siemens Gamesa Renewable Energy, Tonsbakken 16, 2740 Skovlunde, Denmark

**Correspondence:** Deepali Singh (d.singh-1@tudelft.nl)



## Abstract.

Floating offshore wind turbines experience complex hydrodynamic and aerodynamic loading influenced by substructure types and stochastic environmental conditions. Accurately estimating the lifetime fatigue loads requires analyzing thousands of operational scenarios, leading to high computational costs. Moreover, choosing the right input features driving fatigue in floating wind systems and appropriately binning them still remains an open question. We present a fast probabilistic surrogate that maps the site conditions to the loads on the wind turbine. The probabilistic aspect allows the propagation and quantification of statistical uncertainties from the stochastic input quantities [toon<sup>DS</sup>](#) the resulting loads. A fast surrogate eliminates the need to fit a distribution to the site conditions or bin the input data. Rather, all available met-ocean data can be directly used as input, which automatically accounts for the joint distribution in the calculations. The surrogate model in this study uses the mixture density network (MDN) to predict the conditional distribution of the 10-minute damage equivalent loads (DELs) for a 6 MW spar-type floating wind turbine. The MDN achieves high accuracy ( $R^2 > 0.99$ ) in capturing DEL means while efficiently propagating the statistical uncertainties. Furthermore, the surrogate enables quick estimation of 25-year lifetime fatigue damage across a range of potential floating wind farm sites, demonstrating its capability to facilitate rapid decision-making during preliminary site analysis.

## 1 Introduction

### 1.1 Background

Floating offshore wind turbine (FOWT) technology has witnessed a surge in research interest in recent years following the rapidly increasing demands [s<sup>DS</sup>](#) for renewable power production. The structural response of [ana<sup>DS</sup>](#) FOWT is a crucial indicator of its performance, safety, and reliability. During its operational lifetime, a FOWT accumulates fatigue damage as it undergoes time-variable loading in response to the complex and stochastic [offshoremarine<sup>DS</sup>](#) environment. The nature, magnitude, and extent of fatigue are unique to the type of floating foundation, mooring line configuration, wind turbine material, control algorithms, and site conditions.

To ensure a safe and reliable operational life, the FOWT undergoes a certification process involving a rigorous analysis of various design load cases (DLCs) defined by the International Electrotechnical Commission ([IEC, 2024a](#)) ~~in IEC-61400-3-2~~ ([IEC, 2024a](#)) <sup>DS</sup>. The first step involves simulating the DLCs on a type-certified rotor-nacelle assembly with a reference tower and floating foundation. More detailed information about the site is included while defining the DLCs as the project progresses. Subsequently, a site-specific tower, foundation, and mooring line configuration are defined, and a site-specific certification study is performed. The calculations are typically made using time-domain multi-physics engineering tools like OpenFAST ([Jonkman, 2013](#)), HAWC2 ([Larsen and Hansen, 2007](#)), and BHawC ([Couturier and Skjoldan, 2018](#); [Skjoldan, Peter Fisker, 2011](#)) ([Jonkman, 2013](#); [Larsen and Hansen, 2007](#); [Couturier and Skjoldan, 2018](#); [Skjoldan, Peter Fisker, 2011](#)) <sup>DS</sup> throughout this process.

Fatigue is a multi-scale phenomenon that depends on the material composition, composite structure, geometry, and inflow dynamics. The estimation of the fatigue damage for FOWTs, in particular, is computationally intense. The lifetime fatigue

load assessment entails calculating the 10-minute damage equivalent loads (DELs) on multi-variate bins of typical variables characterizing the site and scaling them to the observed probability of occurrence. Not all site variables can be practically included in fatigue load analysis, as the required number of simulations increases exponentially with each additional variable. The choice of the variables in the offshore environment that have the most impact on FOWT fatigue is currently an active  
345 area of research (Papi and Bianchini, 2024). The total computational cost of the simulations also constrains the lower limit of the bin size. While industry-standard engineering tools are necessary for certification, the preliminary site analysis can benefit from *data-driven surrogate* models to provide quick load estimates. Data-driven surrogates can infer complex relationships from data observations alone and do not require prior knowledge of the underlying physics. Fatigue, which is difficult to model using lower-fidelity physics-based approaches, can benefit from such data-driven methods. Using surrogates that can accurately  
350 predict DELs can potentially eliminate the need to bin the site data, fit a multi-variate joint distribution to it, or limit the total number of parameters. Once trained, surrogate models can directly use all the available site information to estimate the site-specific DELs quickly. In addition, probabilistic surrogates can also propagate the statistical uncertainty from the stochastic input variables to the loads.

Data-driven surrogates for wind turbine or wind farm level loads are often designed with deterministic models. Given a  
355 training dataset with  $d$ -dimensional input parameters  $\mathbf{x} \in \mathbb{R}^d$ , the deterministic surrogate maps them to the corresponding output observations  $y \in \mathbb{R}$ . However, the assumption of a deterministic relationship between inputs and outputs does not hold in our case. For instance, keeping every other input constant, a single value of 10-minute mean wind speed can correspond to an infinite number of turbulent inflow patterns, resulting in an infinite number of DEL values with a certain probability distribution conditioned on that wind speed. Probabilistic surrogates model the statistical uncertainty in the input variables by representing  
360 them as a random variable  $\mathbf{X}$  with a joint probability density function (pdf). The corresponding output is, therefore, also a random variable denoted as  $Y$ .

This study is focused on using a probabilistic data-driven surrogate to map 10-minute statistics of the environmental conditions to the corresponding conditional probability distribution of the DEL on the floating spar buoy with a 6 MW Siemens Gamesa wind turbine. The DEL values are calculated using the Siemens Gamesa in-house tool that couples the aeroelastic  
365 code, BHawC (Skjoldan, Peter Fisker, 2011), with the hydrodynamic solver, OrcaFlex (Arramounet et al., 2019). A schematic of this mapping is shown in Figure 1. A highly flexible probabilistic machine learning approach for the surrogate, the mixture density network (MDN) (Bishop, 1994) is used in this study. The probabilistic estimates of DELs are used to subsequently calculate the lifetime fatigue loads at various potential floating wind sites.<sup>DS</sup>

## 1.2 Previous work on probabilistic data-driven modeling for wind turbine load estimation

370 The standard Gaussian process regression (GPR) (Rasmussen and Williams, 2006) is one such probabilistic surrogate that is capable of uncertainty quantification. However, in its standard form, it is restricted to normally distributed homoscedastic responses. Nevertheless, due to its flexibility and ease of implementation, it is widely used as a surrogate to estimate the fatigue load response in wind turbines (Teixeira et al., 2017; Avendaño-Valencia et al., 2021; Li and Zhang, 2019b, 2020; Gasparis et al., 2020; Dimitrov et al., 2018a; Slot et al., 2020).

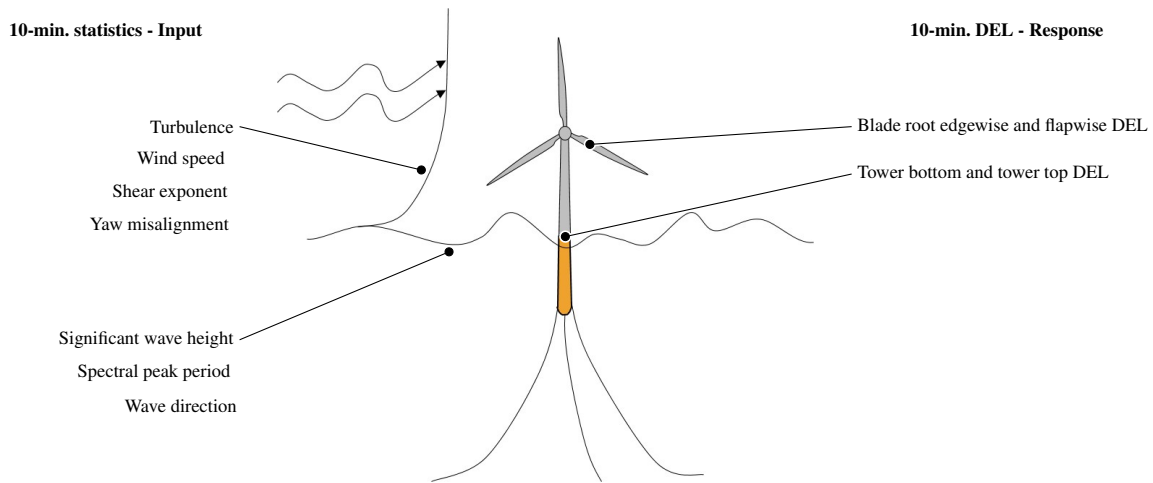

**Figure 1.** Schematic of the surrogate modeling objective.

Further interest in quantifying the uncertainty of the short-term fatigue loads as a function of the input parameters has initiated research into heteroscedastic surrogates. *Heteroscedasticity* refers to the heterogeneity in the response variance as a function of the inputs. The variance observed in DEL at the tower bottom [at](#), for instance, [for](#) very large values of significant wave height, is generally larger than that in calm ocean conditions. It is, therefore, an important consideration when choosing the appropriate surrogate modeling approach for load uncertainty quantification. [Murcia et al. \(2018\)](#)[Mureia et al. \(2018\)](#)<sup>DS</sup> use 100 turbulent inflow realizations at each sample point to obtain the first two moments of the fatigue response. Thereafter, they create two independent surrogates using Polynomial Chaos Expansion (PCE) to model the mean and standard deviation of the fatigue loads on the DTU 10MW reference wind turbine. Even though they use only 140 training samples for their model, the replications scale the computational cost by 100, eventually leading to a costly training database. Another replication-based approach is taken by [Zhu and Sudret \(2020\)](#)[Zhu et al. \(Zhu and Sudret, 2020\)](#)<sup>DS</sup> to model the load response using generalized lambda distributions. In this study, 50 inflow wind field realizations are used at each input sample to estimate the four lambda parameters. Four PCE surrogates are then used to model the parameters independently. The main drawback of replication-based methods is the cost of generating the training database, which makes it challenging to apply them to computationally demanding applications such as floating wind turbines. Secondly, the goodness of fit relies heavily on estimating the statistical parameters in the first step.

Heteroscedasticity can also be modeled using statistical methods. [Zhu and Sudret \(2021\)](#)[Zhu et al. \(Zhu and Sudret, 2021\)](#)<sup>DS</sup> extend the replication-based approach to derive a statistical method combining generalized least-squares with maximum conditional likelihood to estimate the lambda parameters without replications. The main advantage of this method is that it does not assume a Gaussian distribution. However, it cannot handle multi-modality.

[Abdallah et al. \(2019\)](#)[Abdallah et al. \(Abdallah et al., 2019\)](#)<sup>DS</sup> use parametric hierarchical Kriging to predict blade-root-bending-moment extreme loads that are heteroscedastic on a 2MW onshore wind turbine. Their approach combines low- and

high-fidelity observations, where the low-fidelity model informs the high-fidelity GPR. They show that introducing hierarchy helps make the model selection process more robust than the manual tuning of GPR parameters. Singh et al. (2022) Singh et al. (Singh et al., 2022)<sup>DS</sup> apply chained GPR that uses variational inference within a Bayesian framework to account for heteroscedasticity in the data and make predictions of site-specific load statistics on a more complex case of offshore wind turbines. The model can capture the heteroscedasticity in a small dataset but is not scalable to high-<sup>DS</sup> dimensional problems. To address the scalability constraints, the authors extend the study to use mixture density networks on the same dataset to quantify the uncertainty in the load response (Singh et al., 2024a). The application of probabilistic surrogates to floating wind turbines has only been studied to a limited extent in the<sup>DS</sup> literature. Li and Zhang (2019b) Li et al. (Li and Zhang, 2019b)<sup>DS</sup> model the uncertainty in the site conditions using a C-vine copula combined with ANN and GPR. Heteroscedastic probabilistic data-driven modeling has been further explored using Bayesian neural networks (BNNs) for estimating loads on non-instrumented wind turbines using information from fully-instrumented counterparts (Hlaing et al., 2024). Preliminary studies on fatigue load prediction using BNNs show promising results on onshore wind turbines (Omole et al., 2021). BNNs are a powerful class of neural network architectures that assign probability distributions to the network weights and biases, effectively allowing the separation of aleatoric and epistemic uncertainties.<sup>DS</sup>

In summary, only a few approaches attempt to model the uncertainty in the load response of the turbine and the tower. Of those that do, only some consider complex offshore floating systems. This presents a key research gap as the dynamic behavior of floating platforms introduces additional complexity not present in fixed-bottom systems.<sup>DS</sup> Following the promising performance of mixture density networks (MDNs) for fixed bottom wind turbines (Singh et al., 2024a), in this study, we aim to extend the framework to a more complex application of a spar-buoy type wind turbine case. In the case of MDN, the target is modeled as a mixture of  $m \in \mathbb{N}$  Gaussian kernels of varying proportions, capable of generating complex distributions when combined. MDN uses feed-forward networks to learn the parameters of the mixture model.

### 1.3 Research objectives

The main objective of this study is to present a probabilistic data-driven surrogate modeling framework that maps 10-minute statistics of the environmental conditions to the corresponding conditional probability distribution of the DEL on the floating spar-buoy with a 6 MW Siemens Gamesa wind turbine. The DEL values are calculated using the Siemens Gamesa in-house tool that couples the aeroelastic code, BHawC (Skjoldan, Peter Fisker, 2011), with the hydrodynamic solver, OreaFlex (Arramounet et al., 2019). A schematic of this mapping is shown in Figure 1. A highly flexible probabilistic machine learning approach for the surrogate, the mixture density network (MDN) (Bishop, 1994) is used in this study. The probabilistic estimates of DELs are used to subsequently calculate the lifetime fatigue loads at various potential floating wind sites.<sup>DS</sup>

The objectives of this work are threefold:<sup>DS</sup>

- To apply and evaluate a probabilistic machine learning model (MDN) for predicting short-term fatigue loads in floating offshore wind turbines:

Not only are FOWT loads affected by the nonlinear dynamic behavior of the floating wind turbine, but also the underlying

simulations are much more complex, the stochastic hydrodynamic parameters have a bigger impact on the tower, the data is 'noisier', the parameter space is larger, and thereby, the number of simulations is large. This necessitates investigations into robust surrogates. Probabilistic data-driven models are often validated on simpler cases. Complex cases are modeled using deterministic approaches, or with the assumption that the response is Gaussian or homoscedastic. Using a mixture model effectively solves many of the gaps in the literature by propagating uncertainty, including heteroscedasticity, and modeling higher-order moments.

- To demonstrate that such a model can provide insights into probabilistic long-term fatigue estimation, especially in high-dimensional spaces where traditional binning approaches become computationally restrictive:

The lifetime fatigue estimation for FOWTs involves additional complexity, including the joint distribution of metocean conditions and sensitivity to bin sizing. These issues are exacerbated by the exponential growth in simulation cost with each added dimension. A surrogate model enables direct use of historical site condition data, bypassing the need for parametric joint distribution assumptions.

- To investigate the impact of stochastic variability in site conditions on fatigue prediction over long time spans:

We select four potential floating wind sites with similar water depths and use the surrogate model to estimate probabilistic lifetime fatigue loads. We investigate the effect of accounting for the stochastic variability in the 10-minute loads relative to the variation in site conditions. It is demonstrated that due to the law of large numbers, the influence of random seeds on long-term tower load estimation diminishes significantly over a 25-year period, even with 500 seeds (from the probabilistic surrogate). This indicates that stochastic inflow conditions contribute minimally to uncertainty in long-term fatigue predictions.

By addressing these points, this work contributes a validated, flexible surrogate modeling framework that accounts for the complexities of floating wind systems, advancing the state of probabilistic load modeling in floating offshore wind research.<sup>DS</sup>

The rest of the paper is structured as follows. In Section 2, we introduce the floating wind turbine model, describe the simulation tools used, and outline the input features, including their ranges and the sampling strategy. Section 3 then presents the theoretical foundation of the Mixture Density Network (MDN), discusses the chosen hyperparameters, and explains the criteria for evaluating model performance. The results, presented in Section 4, are divided into three sub-sections~~sub-sections~~<sup>DS</sup>. First, we analyze how the model's performance converges across a range of training samples. Next, we validate the selected MDN model's 10-minute conditional distribution estimates under randomly chosen operating conditions, comparing them with those generated by BHawC. Finally, we demonstrate how the probabilistic 10-minute estimates can be used to propagate the statistical uncertainty to the lifetime fatigue damage. Concluding remarks are provided in Section 5.

## 2 Setup

### 2.1 Definition of the floating wind turbine

460 The floating wind turbine in this study is based on a modified geometry of the Hywind Scotland spar buoy foundation (Equinor ASA, 2022). It comprises a 6MW Siemens Gamesa Renewable Energy direct drive wind turbine assembly, SWT-6.0-154, mounted on a spar buoy. The characteristic wind turbine parameters are listed in Table 1. The simulations use a tower with a larger diameter than the tower designed for the Hywind Scotland site. It is, therefore, stiffer and has a higher natural frequency than its installed counterpart. The geometry details of the tower and the floating platform used in the simulation are provided  
465 in Table 2. The floating substructure is attached to the ocean floor using catenary mooring lines, equally spaced at  $120^\circ$  in crowfoot configuration using bridle lines as shown in Figure 2 (Equinor ASA, 2022). The structural properties of the main mooring lines and the bridle lines are listed in Table 3.

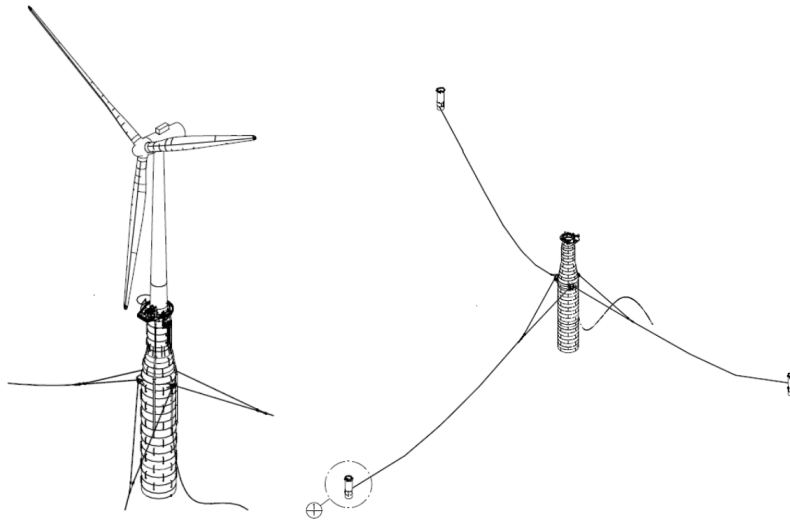

**Figure 2.** Hywind Scotland spar buoy with crowfoot mooring line configuration (Equinor ASA, 2022).

### 2.2 Numerical model

The damage equivalent loads are obtained through time-domain hydro-servo-aeroelastic simulations performed using BHawC-  
470 OrcaFlex coupled implementation. BHawC has been used for several years at Siemens Gamesa for wind turbine load calculations and is continuously validated against turbine prototypes and the entire operational fleet. Similar analysis may be performed with OpenFAST (NREL, 2022; Jonkman, 2013) coupled with OrcaFlex (Masciola et al., 2011) via FASTLink for reproducibility. [Arramounet et al. \(2019\)](#)~~Arramounet et al. (Arramounet et al., 2019)~~<sup>DS</sup> present the mathematical background for the software coupling. In short, the tower, the rotor nacelle assembly, and the blade elements are dynamically modeled in

**Table 1.** Parameters of 6MW Siemens Gamesa wind turbine.

| Parameter        | Property            |
|------------------|---------------------|
| Rated power      | 6000 kW             |
| Configuration    | 3-bladed            |
| Power control    | Pitch               |
| Drivetrain       | Direct drive        |
| Rotor diameter   | 154 m               |
| Hub height       | 96 m                |
| Rated wind speed | 12 ms <sup>-1</sup> |
| Rated tip speed  | 89 ms <sup>-1</sup> |
| Nacelle mass     | 360 te              |

**Table 2.** Wind turbine tower and foundation properties. (Busse-makers, 2020; Equinor ASA, 2022; Equinor, 2024)

| Parameter                           | Value   |
|-------------------------------------|---------|
| Tower bottom outer diameter         | 9.45 m  |
| Tower bottom thickness              | 0.08 m  |
| Tower top outer diameter            | 4.89 m  |
| Tower top thickness                 | 0.029 m |
| Tower bottom elevation above SWL    | 13 m    |
| Draft                               | 78 m    |
| Platform top geometry - length      | 12 m    |
| Platform top geometry - diameter    | 9.4 m   |
| Platform taper length               | 15 m    |
| Platform bottom geometry - length   | 58 m    |
| Platform bottom geometry - diameter | 14.4 m  |

**Table 3.** Catenary mooring line properties.

| Parameter                                | Value       |
|------------------------------------------|-------------|
| Number of mooring lines                  | 3           |
| Angle between mooring lines              | 120°        |
| Mooring bridle line length               | 50 m        |
| Mooring bridle line mass per unit length | 0.348 te/m  |
| Mooring main line length                 | 610 m       |
| Mooring main line mass per unit length   | 0.4322 te/m |
| Mooring line anchor radius               | 640 m       |



475 BHawC. The BHawCLink module acts as a communication channel with the dynamic link library, connecting it to the OrcaFlex API. OrcaFlex simulates the hydrodynamic response of the floater element. Time integration is performed individually on both elements while accounting for the response of the other structure per iteration (Arramounet et al., 2019).

The inflow turbulence is modeled using a spatially varying frozen wind field based on the Mann model (Mann, 1998). The tangential and axial induced velocities are calculated on several aerodynamic nodes on the blades using the blade element momentum theory coupled with Prandtl's tip loss correction and thrust correction at high induction values. Skewed and unsteady  
480 inflow is modeled using the method introduced by Björck (2000) Björck et al. (Björck, 2000)<sup>DS</sup>.

The structural elements are modeled using the co-rotational formulation,<sup>DS</sup> providing geometric nonlinearity (Rubak and Petersen, 2005). The tower, shaft, and blade substructures are modeled using beam elements (Couturier and Skjoldan, 2018)<sup>DS</sup>. The Torsethaugen two-peak wave spectrum generates swell and local wind-driven waves (Torsethaugen and Haver, 2004). The  
485 various elements of the OrcaFlex model are shown in Figure 3. A 6-DOF rigid buoy in OrcaFlex represents the floating substructure. The mooring lines are modeled in OrcaFlex. Each line is divided into several massless spring segments, joined by elements with lumped properties such as mass, damping, added mass, buoyancy, and material properties.

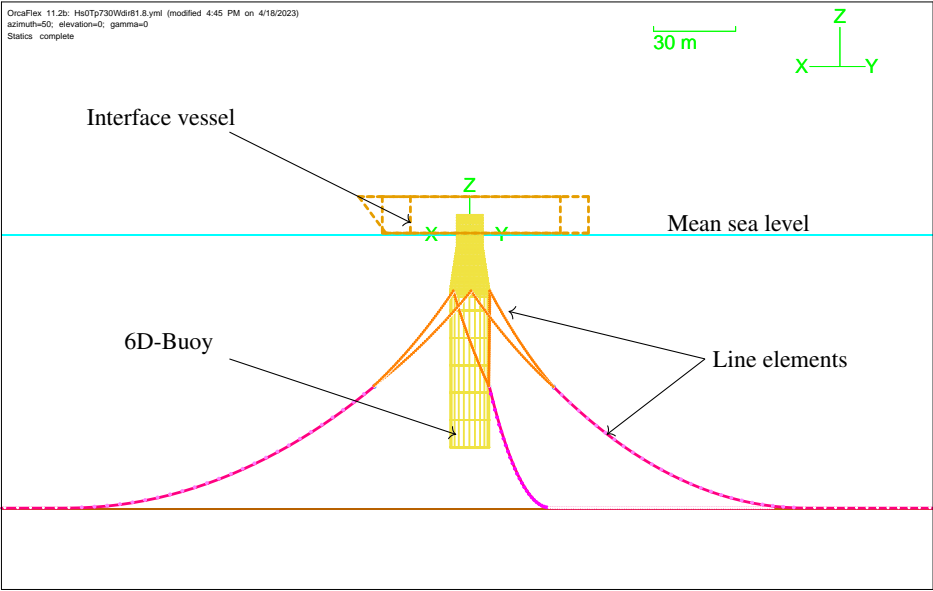

**Figure 3.** Schematic of the OrcaFlex simulation elements.

The simulations are initialized in BHawC with a quasi-static approach where the environmental loads (wind ~~and waves~~<sup>DS</sup>) and inertial loads (gravity and buoyancy) are ~~slowly~~<sup>DS</sup> ramped up in small steps. For every load step, OrcaFlex determines the mooring line static equilibrium based on the floater position determined by BHawC. BHawC calculates the global equilibrium position based on the stiffness matrices and interface loads provided by OrcaFlex. Once the global equilibrium is calculated, the next load step is applied. The dynamic part of the simulations consists of an initialization phase of 300 s to eliminate any initial transients as the wave dynamics, turbulence and substructure motion build up as the artificial structural damping is slowly ramped down. The final post-processing is performed on 600 s dynamic simulations that follow the initialization phase. The simulations for training the surrogate may be performed for a longer duration if necessary, mainly to estimate mooring line fatigue correctly due to its long natural period. The effect on the tower and blade fatigue is shown to not change significantly with larger simulation windows, but rather with the fatigue calculation algorithm used to account for the unclosed cycles (Stewart et al., 2013).

### 2.3 Definition of relevant site features and responses

Having a large feature space can lead to a very expensive surrogate training process, as the number of training samples required grows rapidly with the number of input variables due to the *curse of dimensionality*. It is, therefore, important to identify which variables have the most significant impact on the<sup>DS</sup> fatigue to reduce the input space effectively. ~~Having a large feature space can lead to a very expensive surrogate training process, as the number of training samples needed grows grow<sup>DS</sup> with the number of input variables. It is, therefore, important to identify which variables have the largest impact on the<sup>DS</sup> fatigue.~~<sup>DS</sup>

Several studies in the past have focused on addressing the sensitivity of wind turbine loads to environmental conditions (Robertson et al., 2018, 2019; Teixeira et al., 2019; Shaler et al., 2023; Singh et al., 2024c). The combined effect of environmental and structural parameters has been analyzed on fixed-bottom (Hübler et al., 2017; Velarde et al., 2019; Dimitrov et al., 2018b) (Hübler et al., 2017; Velarde et al., 2019)<sup>DS</sup> and floating wind turbines (Wang et al., 2023; Wiley et al., 2023; Lin et al., 2021; Reddy et al., 2024; Singh et al., 2024c).

Wiley et al. (2023) ~~Wiley et al. (Wiley et al., 2023)~~<sup>DS</sup> demonstrate that for the OC4-DeepCwind semi-submersible platform, the standard deviation of wind speed in the inflow is the most influential parameter affecting the fatigue and ultimate loads on the tower and blades. Secondary drivers of fatigue on the tower bottom moment include turbulence coherence parameters as well as wave characteristics, such as significant wave height and peak spectral period. For blade pitching fatigue, secondary factors include the yaw misalignment angle and geometric features like the blade twist angle. Whereas, the wind-wave misalignment and the current speed and direction seem to have a secondary effect on the blade root bending moment fatigue. Reddy et al. (2024) ~~Reddy et al. (Reddy et al., 2024)~~<sup>DS</sup> perform elementary effects analysis to determine the most significant parameters affecting tower bottom fatigue on the OC3-Hywind Spar platform and the OC4-DeepCwind semi-submersible design. In both cases, the significant wave height is found to be the primary driver. Current-related parameters are shown to have a strong effect,<sup>DS</sup> mainly on the mooring line fatigue. Singh et al. (2024c) ~~Singh et al. (Singh et al., 2024c)~~<sup>DS</sup> use measurement data from the TetraSpar demonstrator to find that the tower and blade fatigue are most highly correlated with the wind speed mean and standard deviation, and significant wave height values.

As observed, although current has a big impact on the mooring line loads, its effect is found to not be as significant on the tower and blades in [the<sup>DS</sup>](#) literature. Therefore, it is not included as a variable feature in the training of the surrogate. A variation in the water depth was also not considered because the mooring line system must be redesigned for any new value of water depth. A framework for automating this process is non-trivial. Furthermore, for slack mooring lines, [Lin et al. \(2021\)](#)[Lin et al. \(Lin et al., 2021\)<sup>DS</sup>](#) show a negligible impact on the tower fatigue with an increase in water depth.

**Table 4.** The list of input features provided to the surrogate model and their corresponding notation.

| Feature                              | Label            |
|--------------------------------------|------------------|
| Wind speed [ $\text{ms}^{-1}$ ]      | $U_{\text{ref}}$ |
| Shear exponent [—]                   | $\alpha$         |
| Turbulence Intensity [%]             | $TI$             |
| Significant wave height [m]          | $H_s$            |
| Spectral peak period [s]             | $T_p$            |
| Wave direction [ $^\circ$ ]          | $W_{\text{dir}}$ |
| Yaw error/ misalignment [ $^\circ$ ] | $Yaw$            |

**Table 5.** The list of output channels that the surrogate models are trained to predict.

| Response                      |
|-------------------------------|
| Tower bottom fore-aft DEL [—] |
| Tower top fore-aft DEL [—]    |
| Blade root edgewise DEL [—]   |
| Blade root flapwise DEL [—]   |

The targets the surrogates are trained on are listed in Table 5. Each target is trained with a separate surrogate model. This study only calculates the short-term DELs in the local coordinate system [of the component<sup>DS</sup>](#). DELs result from the conversion of the irregular load time series to a constant amplitude and frequency signal that produces [an<sup>DS</sup>](#) equivalent fatigue damage. [The](#) Rainflow counting (Matsuishi and Endo, 1968) algorithm is used to obtain the load ranges  $S_i$  and the number of load cycles  $n_i$  needed to calculate the DEL as,

$$DEL := \left( \frac{\sum n_i S_i^m}{n_{\text{ref}}} \right)^{1/m}, \quad (1)$$

where  $n_{\text{ref}}$  is 600 for 1Hz DELs over 10 minutes.  $m$  is the Wöhler coefficient with values 3.5 for the tower, 10 for blade flapwise, and 8 for blade edgewise moments. [Finally, Z-score normalization is used to scale the DEL to its dimensionless form.<sup>DS</sup>](#)

## 2.4 Feature bounds

The feature bounds are defined based on the observations of data on sites where floating wind farms could potentially exist (Creane et al., 2024) and where data was readily available. Table A1 lists the selected sites with their location and water depth values. The ERA5 reanalysis data, produced by the European Center for Medium-Range Weather Forecasts (ECMWF) on behalf of the European Union’s Copernicus Climate Change Service (C3S), is used for the analysis in this section.

### 2.4.1 Average wind speed at hub height

The wind speed at hub height ( $U_{\text{ref}}$ ) varies between 3 and 28  $\text{ms}^{-1}$ , which is the operational range of the wind turbine investigated in this study.

### 2.4.2 Shear exponent

545 The shear exponent  $\alpha$  is defined according to the wind profile power law as,

$$\frac{U}{U_{\text{ref}}} = \left( \frac{z}{z_{\text{ref}}} \right)^\alpha, \quad (2)$$

where,  $U$  is the wind speed at height  $z$ , and  $U_{\text{ref}}$  is the known wind speed at height  $z_{\text{ref}}$ . We used the ERA5 reanalysis data to obtain wind speed values at 10 m and 100 m for the sites listed in Table A1. Assuming the wind profile follows the power law, the shear exponent is calculated using Equation (2). The distribution of the shear exponent is shown in Figure 4a, with values  
550 primarily ranging between 0 and 0.2. It is also plotted against wind speed in Figure 4b. In our database, the shear exponent is uniformly distributed in the region corresponding to the dashed box in Figure 4b.

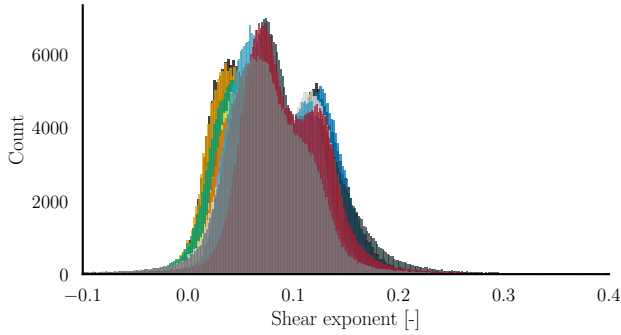

(a) Shear exponent distribution

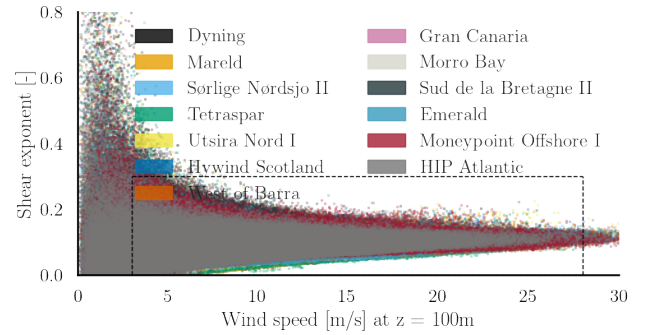

(b) Shear exponent vs. Wind speed

**Figure 4.** (a) Histograms of the shear exponent  $\alpha$  for selected sites for ERA5 reanalysis data from 1990 to 2019. (b) Shear exponent shown as a function of wind speed, marked by a box denoting the selected sampling domain.

### 2.4.3 Turbulence intensity

The lower range of turbulence intensity is 0.1%, and the upper limit is designed to be 20% greater than the prescribed IEC Class C standard (IEC, 2010) for the Normal Turbulence Model (NTM). The function for class C turbulence intensity (in percentage)  
555 is given by,

$$TI = 100 \times \frac{I_{\text{ref}}(0.75V_{\text{hub}} + 5.6)}{V_{\text{hub}}} \quad (3)$$

where,  $I_{\text{ref}} = 0.12$  is the expected value of turbulence intensity at  $15 \text{ ms}^{-1}$ . The upper limit of turbulence intensity for sampling is, therefore,  $1.2 \times TI$ . Figure 5 shows the chosen range, with the IEC class C turbulence and the measured turbulence at the FINO 3 metmast,<sup>DS</sup> which is referenced in the Buchanan deep met-ocean report (Equinor ASA, 2022).

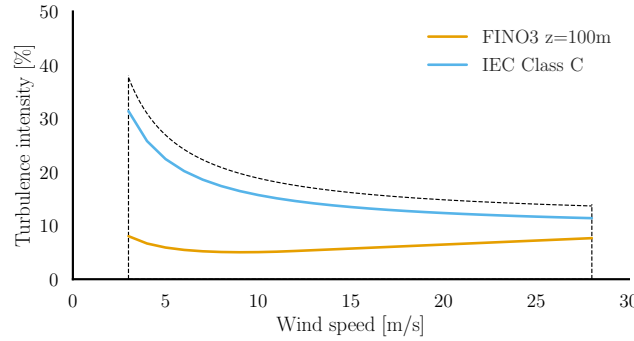

**Figure 5.** Chosen turbulence intensity range in dashed lines, along with the IEC class C turbulence profile for NTM, and measured turbulence at FINO 3 (German Bight) from the met-ocean analysis report on the Hywind Scotland project (Equinor ASA, 2022).

#### 560 2.4.4 Significant wave height

Waves in deep water primarily originate from two sources: wind-induced waves and swell waves. It is useful to consider the correlation between wind speed and significant wave height while training the surrogate to avoid including non-physical wind-wave combinations. Figure 6a illustrates a scatter plot of significant wave height ( $H_s$ ) versus wind speed, based on ERA5 reanalysis data for the selected sites. The sampling domain is also a function of wind speed, highlighted with the dashed lines.

565 The upper and lower ranges of sampling for the significant wave height are defined empirically based on these observations. In this case, the functions are rather conservative and subject to modification based on the kind of sites the user would want to use the surrogate model on. The equations for the upper and lower limits for  $H_s$  are listed in Appendix B1.

#### 2.4.5 Peak spectral period

The empirical functions are defined for the spectral period range based on the significant wave height. Figure 6b illustrates the sampling domain with dashed lines, overlaid on observational data from the ERA5 reanalysis. This plot also includes  $H_s - T_p$  values corresponding to wind speeds below the cut-in speed and above the cut-out speed. The functions defining this range are detailed in Appendix B2. As with the significant wave height, these bounding functions can be adjusted based on the region of primary interest to the user.

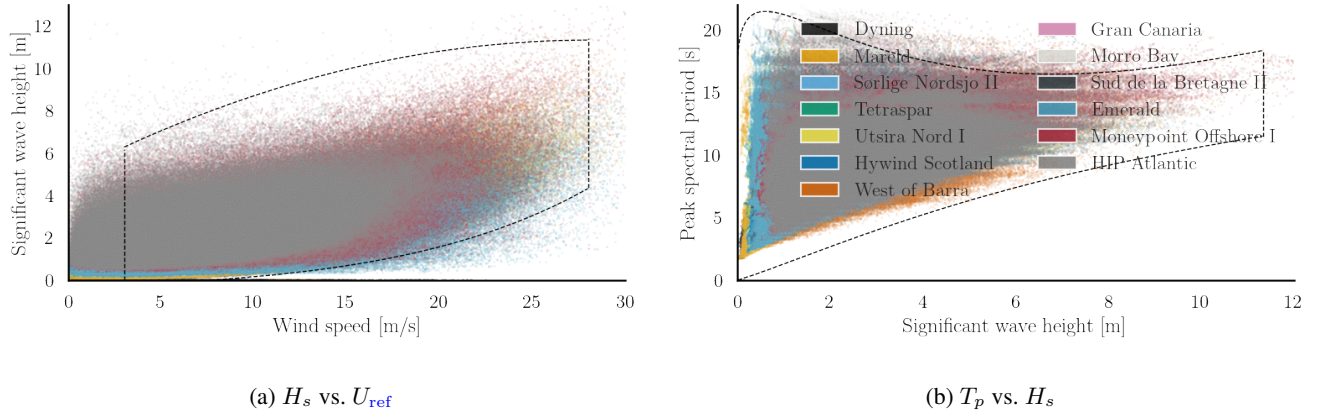

**Figure 6.** Scatter plots of (a) the significant wave height vs. the wind speed at 100 m, and (b) peak spectral period vs. significant wave height for the selected sites (Table A1) based on the ERA5 reanalysis data from 1990 to 2019.

#### 2.4.6 Wave direction

575 The wind turbine is always assumed to face the inflowing wind. Therefore, only the wave direction is varied to introduce wind-wave misalignment. Wave direction is considered to be an independent variable and sampled uniformly between  $0^\circ$  and  $360^\circ$ . For asymmetric floating foundations, however, wind directions would also need to be considered as an independent parameter.

#### 2.4.7 Initial yaw misalignment

The effect of the initial yaw misalignment is chosen to be evaluated at  $-5.6^\circ$ ,  $0^\circ$  and  $5.6^\circ$  while performing fatigue calculations.  
 580 Therefore, we selected the sampling bounds between  $1.1 \times -5.6^\circ$  and  $1.1 \times 5.6^\circ$ .

### 2.5 Training and testing database generation

#### 2.5.1 Training database

Sobol sampling (Sobol, 1967) is used to jointly sample uniformly in seven dimensions to generate the training dataset. The samples lying outside the aforementioned feature bounds are discarded, resulting in a total of 9041 training samples. [Alternatively,](#)  
 585 [a multivariate distribution fitting the available data can be used to define the sampling space bounds.](#)<sup>DS</sup> Each sample corresponds to a unique wave seed in OrcaFlex and a single inflow turbulence seed in BHawC. This approach is designed to emulate the inherent stochasticity of real-world inflow variables. Note that the statistical variation in the flow field is constrained by the BHawC implementation to only 45 turbulence seeds. Consequently, these seeds had to be reused, and the inflow turbulence box could not be uniquely defined for every case.

The values of the shear exponent, turbulence intensity,<sup>DS</sup> and yaw misalignment are not randomly assigned to the test cases. Instead, they take the values used commonly while performing fatigue design load case evaluations. The shear exponent was fixed at 0.08, with yaw misalignment values of  $-5.6^\circ$ ,  $0^\circ$ , and  $5.6^\circ$ , and turbulence intensity corresponding to IEC Class C values.  $H_s$ ,  $T_p$ ,  $TI$ , and  $U_{ref}$  were jointly sampled in a random manner, without being tied to any specific location, but constrained within the defined feature bounds. For future studies, jointly sampling the test points across all variables is recommended for a fairer evaluation of the surrogate's performance.<sup>DS</sup> In total,  $n_{test} = 47$  test samples were used in this study. Each test sample simulation was repeated with  $n_{seeds} = 44$  random seeds for turbulence and waves to capture the statistical variation in the DEL values from the variation in the wind and wave fields. The seed repetition establishes a *reference* conditional distribution for each sample, which is used to compare against the probabilistic predictions of the surrogate model in Section 4.2. The samples used for training and testing the surrogate models are shown in Figure 7.

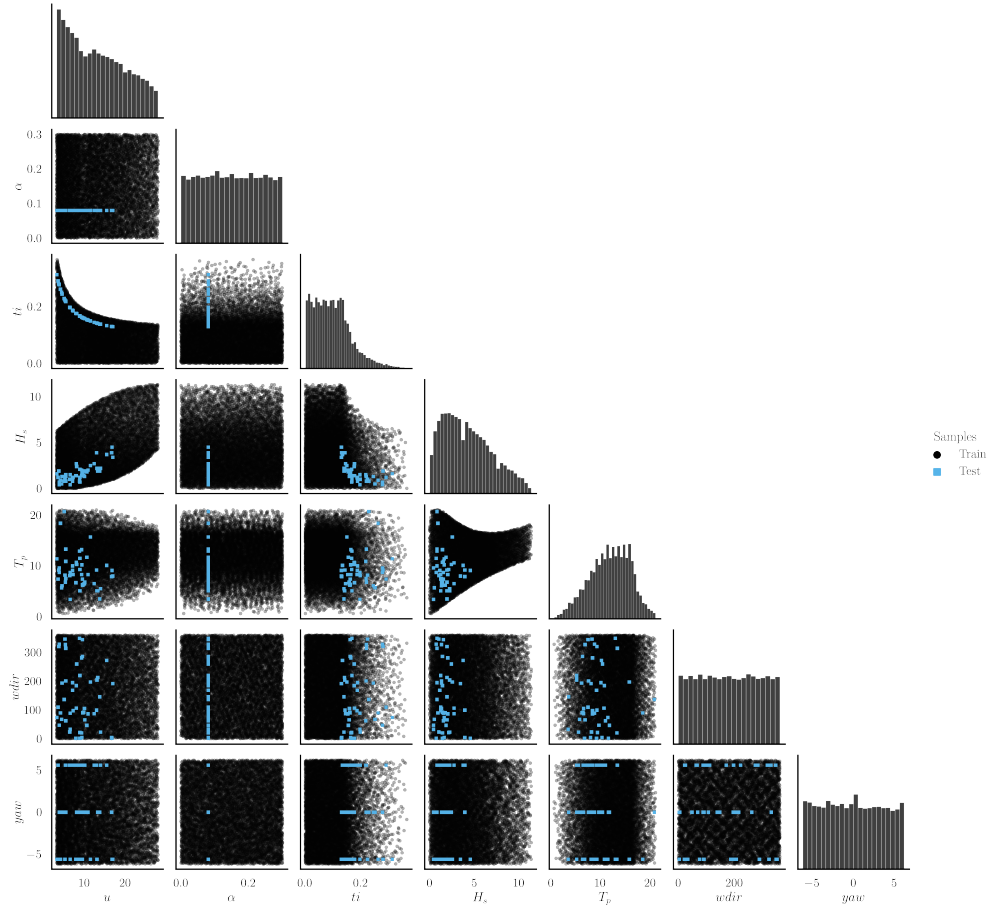

**Figure 7.** Paired scatter plots and marginal distributions of the training and testing datasets.



### 3 Methodology

This section briefly describes the theoretical basis of the mixture density network models investigated in this study, as well as the accuracy metrics considered to evaluate the surrogate's goodness of fit. The database  $\{\mathbf{x}^q, y^q\}_{q=1 \dots n}$  consists of  $n$  pairs of inputs  $\mathbf{x} \in \mathbb{R}^d$ , and the corresponding output  $y \in \mathbb{R}$ . The surrogate is calibrated separately for each target.

#### 3.1 Mixture density networks

A mixture density network is a probabilistic regression method that combines Gaussian mixture models with artificial neural networks (Bishop, 1994). The conditional distribution of the target is represented as a linear combination of  $m \in \mathbb{N}$  Gaussian kernel functions,

$$p(y | \mathbf{x}) = \sum_{i=1}^m \alpha_i(\mathbf{x}) \mathcal{N}(y | \mu_i(\mathbf{x}), \sigma_i^2(\mathbf{x})), \quad (4)$$

where  $\alpha_i(\mathbf{x})$  are the weights or mixing coefficients assigned to the  $i^{\text{th}}$  mixture component.  $\mathcal{N}(y | \mu_i(\mathbf{x}), \sigma_i^2(\mathbf{x}))$  is a Gaussian kernel representing the conditional density of the  $i^{\text{th}}$  component of the target distribution, with parameters  $\mu_i(\mathbf{x})$  and  $\sigma_i(\mathbf{x})$ . Instead of mapping the inflow features  $\mathbf{x}$  to the load statistics  $y$  directly, the neural network is trained to predict the parameter vector,  $\mathbf{z} \in \mathbb{R}$  consisting of  $\alpha_i(\mathbf{x}), \mu_i(\mathbf{x})$  and  $\sigma_i(\mathbf{x})$  for  $1 < i < m$  (Singh et al., 2024b)<sup>DS</sup>.

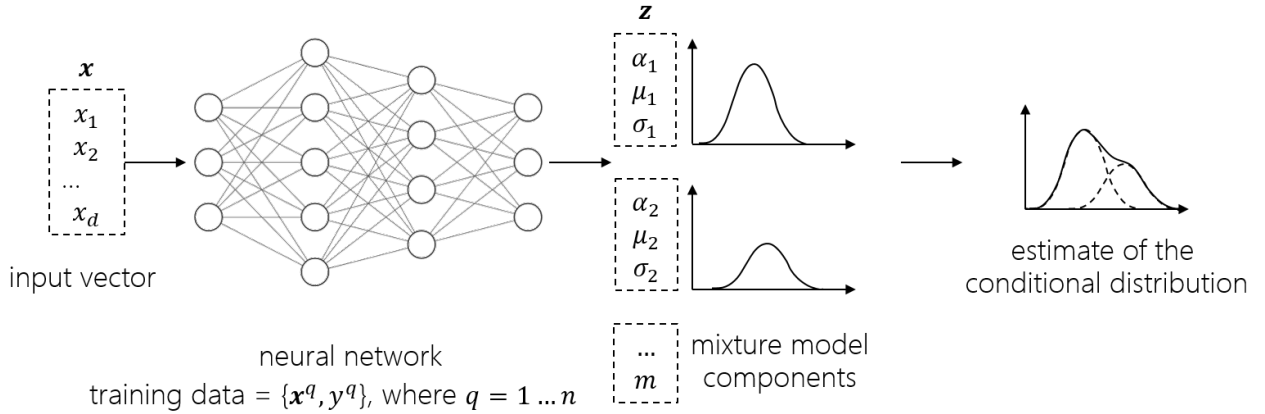

**Figure 8.** Schematic representation of Mixture Density Networks.

The mixing coefficients  $\alpha_i(\mathbf{x})$  must sum up to exactly 1. A *softmax* function is used to handle this constraint. Positive values of the standard deviation are ensured by representing them as exponential functions of the corresponding network outputs,  $z_i^\sigma$ . The means are not constrained.

The error function  $E^q$  is defined as the negative log of the likelihood. For pattern  $q$ , it is given by,

$$E^q = -\ln \left( \sum_{i=1}^m \alpha_i(\mathbf{x}^q) \mathcal{N}(y^q \mid \mu_i(\mathbf{x}^q), \sigma_i^2(\mathbf{x}^q)) \right). \quad (5)$$

The likelihood of the dataset is the product of the likelihoods of the individual data samples.

620 The derivative of the error function is calculated at the output layer and is back-propagated to get its gradient with respect to the network weights. The values of the network parameters are adjusted to minimize the error function using a gradient descent optimization. This study uses the Adam optimizer (Kingma and Ba, 2017) to perform stochastic gradient descent. The model is initialized ten times for any given case in order to choose the best initial conditions for the optimizer. The hidden layers in our network use the rectified linear unit (ReLU). The output layer of the network does not have an activation function; therefore, 625 the outputs are just linear combinations of the inputs from the previous layer.

Minimizing the error function is an ill-posed problem as there is a conflict between learning the function that fits the data perfectly and remaining robust under varying sets of training data. As the network size grows, the function space increases and the neural network tends to overfit. The<sup>DS</sup> MDN model training especially seemed susceptible to it. Among several ways to avoid overfitting (Montavon et al., 2012), in this study, we implemented a combination of *early-stopping* (Yao et al., 2007) and 630 *L1* and *L2 regularization* (Ng, 2004).

The main hyperparameters used in this study to train the models to obtain the results in Section 4 are summarized in Table 6. In subsequent sections, we test the performance of the MDN model with various architectures. The features and targets are scaled with the standard scaler before training.

### 3.2 Accuracy metric

635 The qualitative assessment of the performance of the surrogate model is based on two criteria: the coefficient of determination ( $R^2$ ) and the Wasserstein distance ( $d_{W2}$ ), as described hereafter.

#### 3.2.1 Coefficient of determination $R^2$

The coefficient of determination, also known as the  $R^2$ , is a common measure of the goodness of fit of a model. It is defined as,

$$640 \quad R^2 = 1 - \frac{\sum (y_i - \hat{y}_i)^2}{\sum (y_i - \bar{y})^2}, \quad (6)$$

where  $\hat{y}_i$  is the predicted output,  $y_i$  is the observed value and  $\bar{y}$  is the mean of the observed values.  $R^2$  is interpreted as the linear correlation between the predicted and observed values of the output vector. To assess the accuracy of the predicted conditional distribution of the response compared to the BHawC reference, we calculate the  $R^2$  value for the conditional probability density function's (pdf's) mean and standard deviation. These two quantities are derived empirically by obtaining 5000 samples from 645 the surrogate-predicted conditional distribution and  $n_{\text{seeds}}$  seed (turbulence and wave) repetitions per test case.

**Table 6.** Summary of the network hyperparameters

| Network hyperparameter                      | Value                                   |
|---------------------------------------------|-----------------------------------------|
| Number of mixture components                | 4                                       |
| Activation function (hidden layers)         | ReLU                                    |
| Activation function (output layer)          | None                                    |
| Learning rate                               | $5e^{-3}$                               |
| Maximum epochs                              | 5000                                    |
| Mini-batch size                             | 100                                     |
| Optimizer                                   | Adam                                    |
| Regularization                              |                                         |
| $\lambda$ for $L1$ -regularization          | $1e^{-3}$                               |
| $\lambda$ for $L2$ -regularization          | $1e^{-3}$                               |
| Early-stopping                              |                                         |
| Early-stopping patience                     | 100                                     |
| Early-stopping monitor                      | validation loss                         |
| Number of early-stopping validation samples | 600                                     |
| Steps per epoch                             | number of training samples / batch size |

### 3.2.2 Wasserstein distance

The Wasserstein metric is a distance function that compares the difference between the pdfs of two random variables. It is symmetric, non-negative, and satisfies the triangle inequality, making it a proper distance metric. In the case of 1-D distributions, the Wasserstein-2 distance between a reference empirical measure  $Y$  and predicted measure  $\hat{Y}$ , is defined as (Villani, 2009; Peyré and Cuturi, 2019; Ramdas et al., 2015),

$$W_2(Y, \hat{Y}) = \left( \int_0^1 |F^{-1}(t) - G^{-1}(t)|^2 dt \right)^{1/2} \quad (7)$$

where  $F^{-1}$  and  $G^{-1}$  are the quantile functions of  $Y$  and  $\hat{Y}$  respectively. The individual quantile functions are obtained from the samples of the empirical distributions and then integrated. In this paper, we calculate the Wasserstein distance between the conditional distribution predicted for each sample ( $\hat{Y}$ ) and the conditional distribution obtained as a reference through seed repetitions in BHawC/OrcaFlex ( $Y$ ).  $\hat{Y}$  consists of 5000 samples from the surrogate's estimate, and  $Y$  is obtained from  $n_{\text{seeds}}$  turbulence and wave seed repetitions in BHawC/OrcaFlex. The distance metric is normalized by the standard deviation of the reference conditional distribution,  $Y$ . Therefore, a value of  $\frac{W_2}{\sigma(Y)} = 1$  is the distance between a distribution with mean  $\mu(Y)$ ,

scale  $\sigma(Y)$ , and a degenerate distribution with the same mean. We calculate the global performance of the model by averaging the normalized Wasserstein distance over  $n_{\text{test}}$  test samples as,

$$d_{W2} = \mathbb{E}_{n_{\text{test}}} \left( \frac{W_2}{\sigma(Y)} \right). \quad (8)$$

## 4 Results

This section is divided into three parts. The first part presents a convergence study on the number of training samples, highlighting the model’s robustness and demonstrating a clear trade-off between the computational cost of data generation and the resulting accuracy. A related hyperparameter study to determine the network architecture is presented in Appendix C. The second part validates the performance of the surrogate on the test dataset. The validated model is used to make lifetime fatigue damage estimates on the wind turbine components in response to different site conditions in the third section.

### 4.1 Choice of training data size

This section shows the convergence study with respect to the number of training samples for the tower bottom fore-aft DEL. It is assumed that the same architecture can be used to predict the remaining channels. Three networks for the mixture density networks are compared to test the robustness of the approach, as listed in Table 7. The MDNs contain four mixture elements. The rest of the hyperparameters are as specified in Table 6. In Figure 10, at each  $N_{\text{train}}$  value, the models are trained on 25 different subsets of the total training data space to capture the sensitivity of the model’s fit to the choice of the training samples. The boxes reflect the variation in the  $R^2$  values as a result of the choice of training data points. The boxes extend between the data’s first ( $Q1$ ) and third ( $Q3$ ) quartile, and the horizontal line across the box indicates the median. The difference between  $Q1$  and  $Q3$  defines the interquartile range ( $IQR$ ). The upper whisker extends to the largest data values within  $1.5IQR$  above  $Q3$ . The lower whisker, similarly, extends to the lowest data point within  $1.5IQR$  below  $Q1$ . Outliers are visible as dots beyond the whisker boundaries. Figure 10a is the  $R^2$  value obtained from predicting the mean of the conditional pdf of the tower bottom fore-aft DEL, averaged over the test dataset. The mean in the BHawC reference is calculated using 44 realizations of the wind and wave fields. The diminishing size of the  $IQR$  as the number of samples grows is a combination of the increasing robustness of the model, and the smaller variability in the test samples as fewer untrained samples remain in the dataset.

**Table 7.** The MDN architectures considered for the convergence study.

| Notation    | Number of layers | Number of nodes per layer |
|-------------|------------------|---------------------------|
| MDN[10, 10] | 2                | 10                        |
| MDN[30, 30] | 2                | 30                        |
| MDN[50, 50] | 2                | 50                        |

MDN uses a neural network framework capable of inferring extremely complex underlying functions given sufficient data. In this case, <sup>DS</sup> MDN <sup>DS</sup> converges to consistent values of both  $R^2$  of the conditional mean and  $d_{W2}$  above 4250 samples. We also see that MDN estimates are closer to the ground truth with larger networks of 30 or 50 nodes per layer. The performance of MDN[30,30] and MDN[50,50] is almost identical in this region, indicating good model robustness with respect to the size of the layer.

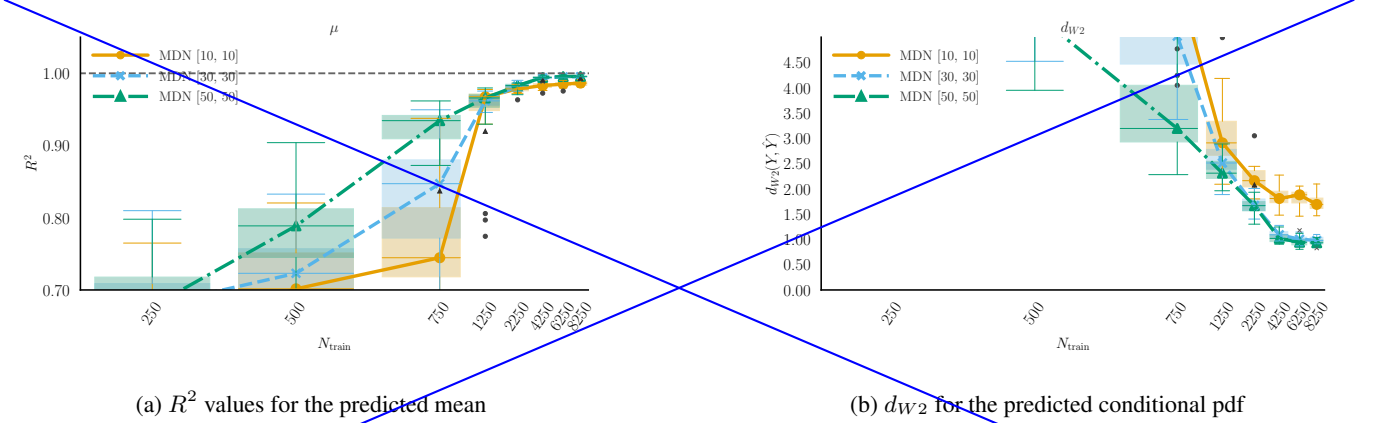

**Figure 9.** Convergence plots for the tower bottom fore-aft DEL channel. (a) Shows the convergence of the predicted mean as a function of the number of training samples for three MDN architectures. (b) Shows the normalized Wasserstein distance as a function of the training samples.

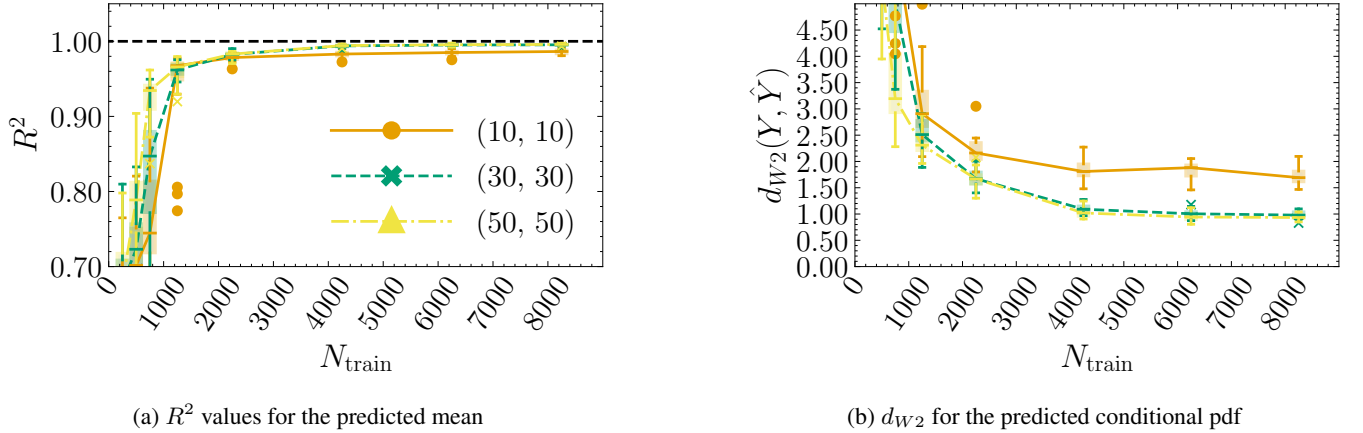

**Figure 10.** Convergence plots for the tower bottom fore-aft DEL channel. (a) Shows the convergence of the predicted mean as a function of the number of training samples for three MDN architectures. (b) Shows the normalized Wasserstein distance as a function of the training samples.

Figure 10b shows the normalized 2-Wasserstein distance between the predicted and reference pdf. The Wasserstein distance quantifies the similarities between the predictions and the reference. It is, thus,<sup>DS</sup> a good indicator of whether or not the surrogate can correctly estimate the variation in the target resulting from a combination of epistemic and aleatoric sources. The predicted pdf is based on 5000 realizations from the estimated Gaussian mixture in MDN. The reference is based on  
690  $n_{\text{seeds}} = 44$  BHawC/OrcaFlex realizations. Since 44 samples are insufficient to characterize the reference pdf fully, there is certainly an error associated with the  $d_{W2}$  values; therefore,  $d_{W2}$  cannot be expected to be zero in practice. Beyond 4250 samples, there is a small but marginal improvement in the  $d_{W2}$  values from MDN[30, 30] and MDN[50, 50].

In conclusion, the two-layered MDN surrogates (MDN[30, 30] and MDN[50, 50]) reach convergence in terms of  $d_{W2}$  at 4250 samples. For subsequent sections, the MDN models will be trained with a dataset of 8250 points, as this provides  
695 marginally better predictions with only a slight increase in model fitting cost.

The choice of the number of layers and nodes in the neural network, as well as the number of mixture components,<sup>DS</sup> is based on a hyperparameter study, presented in Appendix C.

## 4.2 Surrogate model validation

In this section, the performance of the MDN model is evaluated for the load channels listed in Table 5, on the selected test  
700 dataset presented in Section 2.5.2. Based on studies in Section 4.1 and Appendix C, the values of hyperparameters used in training the models, in addition to Table 6, are listed in Table 8.

**Table 8.** List of hyperparameters used for training the MDN model for the final load prediction.

| MDN hyperparameter           | Value |
|------------------------------|-------|
| Number of hidden layers      | 3     |
| Width layer 1                | 30    |
| Width layer 2                | 30    |
| Width layer 3                | 50    |
| Number of mixture components | 4     |
| Number of training samples   | 8250  |

Table 9 provides a quantitative analysis of the ~~model~~model's<sup>DS</sup> performance in terms of the average  $R^2$  and  $d_{W2}$  values. The conditional mean is accurately captured by the MDN model with  $R^2$  exceeding 0.99 on the test dataset. The goodness of fit on the conditional distribution is evaluated using  $d_{W2}$ . Lower  $d_{W2}$  values indicate a smaller difference between the predicted  
705 and reference conditional distributions across the test database. As the  $d_{W2}$  values are normalized by the local reference standard deviation, we can compare the performance of the models across different load channels. MDN's performance remains consistently good on the tower top and blade targets. The tower bottom channel shows a larger deviation in the  $d_{W2}$  values, which is investigated further in Figure 11.

Figure 11 shows the statistics of the conditional distribution of the DEL variation at the tower bottom fore-aft direction Since  
710 44 seeds is a relatively small sample size to determine the true mean and standard deviation of the population, a gray area is

**Table 9.** Quantitative analysis of MDN model’s predictions using  $d_{W2}$  and  $R^2$  as evaluation metrics.

| Model    | Tower bottom FA | Tower top FA | Blade root edgewise | Blade root flapwise |
|----------|-----------------|--------------|---------------------|---------------------|
| $d_{W2}$ | 0.86            | 0.35         | 0.36                | 0.36                |
| $R^2\mu$ | 0.99            | 0.99         | 0.99                | 0.99                |

highlighted in Figure 11a and Figure 11b to reflect the uncertainty in the reference values. For the mean, the 95% confidence interval ( $CI_t$ ) is calculated with the t-distribution (Rouaud, 2013), assuming the response is normal. It is defined as,

$$CI_t = \mu_{\text{reference}} \pm t \cdot \frac{\sigma_{\text{reference}}}{\sqrt{n_{\text{seeds}}}}, \quad (9)$$

where  $\mu_{\text{reference}}$  is the mean and  $\sigma_{\text{reference}}$  is the standard deviation calculated from the simulation samples.  $n_{\text{seeds}} = 44$  is the number of seeds with which the simulations were repeated.  $t$  is the  $t$ -score for 95% confidence, given  $n_{\text{seeds}}$  samples from a normally distributed population. The bounds are similarly calculated using the  $\chi^2$  distribution for the standard deviation. The bounds are asymmetric as the  $\chi^2$  distribution is skewed.  $\chi_L$  and  $\chi_R$  are based on 5% and 95% tails of the  $\chi^2$  distribution. The true standard deviation,  $\sigma$ , is expected to lie between the bounds,

$$\sqrt{\frac{(n_{\text{seeds}} - 1)}{\chi_L^2}} \sigma_{\text{reference}} \leq \sigma \leq \sqrt{\frac{(n_{\text{seeds}} - 1)}{\chi_R^2}} \sigma_{\text{reference}}. \quad (10)$$

The individual pdfs are shown in Figure 11 for two site conditions. The reference BHawC realizations are plotted as histograms overlaid with kernel density estimate (KDE) plots generated from 5000 samples from the conditional pdf predicted by the surrogate model. The estimates include two sources of uncertainty. The first is the epistemic uncertainty of inferring a function from limited data. The second is due to the irreducible noise term (aleatoric)<sup>DS</sup>, which is a part of the observed stochastic process. The subsequent plots assume the standard deviation of the combined uncertainty.

Figure 11a shows the predicted conditional mean ( $\mu_{\text{surrogate}}$ ) of the normalized tower bottom fore-aft DEL as a function of the reference conditional mean ( $\mu_{\text{reference}}$ ) derived from BHawC/Orcaflex simulations. As already indicated in Table 9, the  $R^2$  values are greater than 0.99 for MDN, indicating an excellent fit. Similarly, the standard deviation derived from the surrogates ( $\sigma_{\text{surrogate}}$ ) is plotted against the ground truth reference ( $\sigma_{\text{reference}}$ ) in Figure 11b. Despite the slight overprediction of the standard deviation, MDN is able to capture the heteroscedastic trend in the data. Figure 11c corresponds to a below-rated velocity of  $9.8 \text{ ms}^{-1}$  and a wind-wave misalignment of  $105^\circ$ . Under these conditions, the BHawC reference is a short-tailed conditional pdf. Since MDN assumes a medium-tailed Gaussian mixture conditional, there is a tendency for the surrogate model to overestimate the standard deviation (Figure 11b). The reason for the tower bottom fore-aft DELs to be restricted between a very small range resulting in such a short-tailed distribution is not obvious and demands a deeper investigation into the behavior of the tower structure and control laws, which is beyond the scope of this paper. A similar pattern is not observed in the other three load channels. Figure 11d corresponds to an example of a near-rated wind speed case, where the MDN predictions show a closer match to the reference conditional distribution.



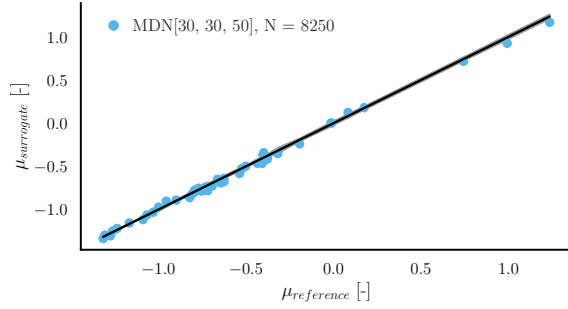

(a) Prediction of the mean DEL

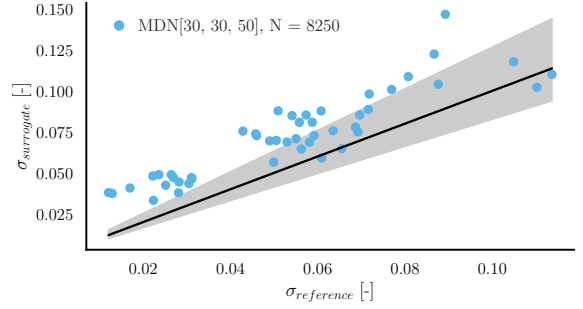

(b) Prediction of the standard deviation of the DEL

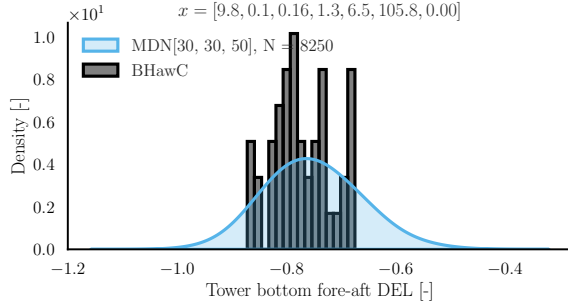

(c) Conditional pdf below-<sup>DS</sup>-rated conditions

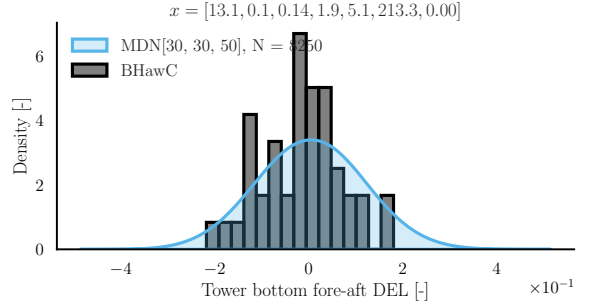

(d) Conditional pdf near-<sup>DS</sup>-rated conditions

**Figure 11.** Load predictions using MDN for the tower bottom fore-aft DEL (normalized). Figure (a) shows the surrogate predicted conditional mean at the test locations vs. the conditional mean calculated using BHawC. Figure (b) shows the predicted and reference standard deviations of the conditional pdf. Figures (c) and (d) compare the conditional pdf plots between the surrogate and the simulation at below-<sup>DS</sup>-rated and near-<sup>DS</sup>-rated conditions, <sup>DS</sup> respectively. The values in vector  $x$  denote:  $[U_{ref}, \alpha, TI, H_s, T_p, W_{dir}, Y_{aw}]$  with units specified in Table 4.

A similar analysis is performed for the tower top fore-aft DEL channel in Figure 12. The conditional standard deviation estimated from the MDN surrogate <sup>isare</sup> within the error bounds of the small population assumption, indicating a very good fit.

740 Figure 13 and Figure 14 show the surrogate models' performance on the blade root flapwise and edgewise DEL, <sup>DS</sup> respectively. Similar to the tower top, the standard deviation and mean estimates from the MDN surrogate agree very well with the BHawC reference in both blade channels.

These results indicate that the surrogate model demonstrates a good level of reliability in accurately predicting the DELs with respect to the BHawC/OrcaFlex reference. Consequently, we assume that the model can be extended to other operating  
745 conditions without necessitating further verification.

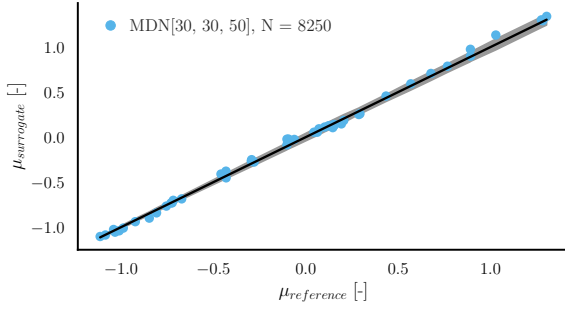

(a) Prediction of the mean DEL

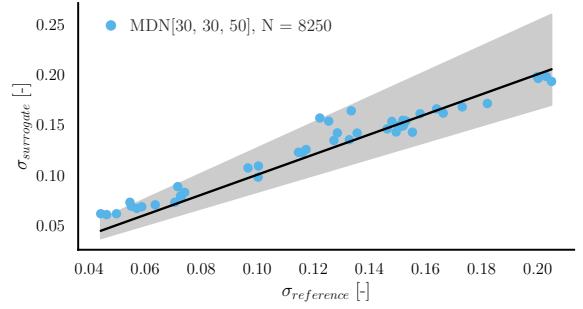

(b) Prediction of the standard deviation of the DEL

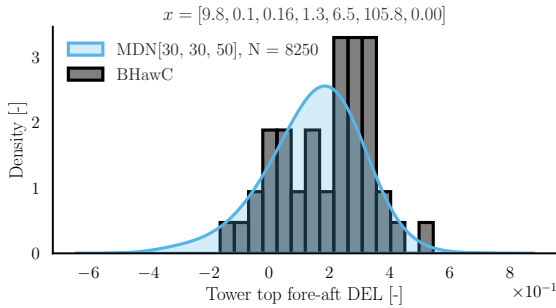

(c) Conditional pdf below-<sup>DS</sup>-rated conditions

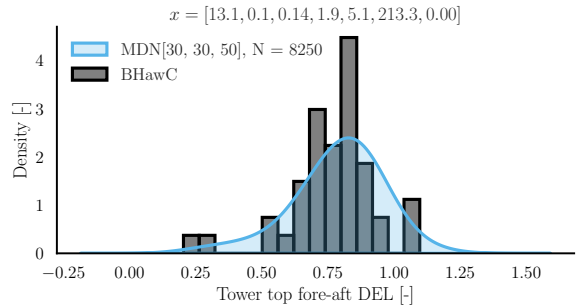

(d) Conditional pdf near-<sup>DS</sup>-rated conditions

**Figure 12.** Load predictions using MDN for the tower top fore-aft DEL (normalized). Figure (a) shows the surrogate predicted conditional mean at the test locations vs. the conditional mean calculated using BHawC. Figure (b) shows the predicted and reference standard deviations of the conditional pdf. Figures (c) and (d) compare the conditional pdf plots between the surrogate and the simulation at below-<sup>DS</sup>-rated and near-<sup>DS</sup>-rated conditions, <sup>DS</sup> respectively. The values in vector  $x$  denote:  $[U_{\text{ref}}, \alpha, TI, H_s, T_p, W_{\text{dir}}, Y_{\text{aw}}]$  with units specified in Table 4.

### 4.3 Lifetime damage equivalent loads

The calculation of aggregated fatigue loads in onshore wind cases consists of binning the wind speed and scaling the loads at each bin by the probability of occurrence of the wind speed during the operating lifetime of the wind turbine. Floating wind turbine fatigue evaluations are more complex <sup>because</sup><sup>DS</sup>, firstly, many more environmental parameters must be considered to characterize the site. Secondly, the bins need to be defined on a joint probability space. The process of choosing the right variables for the fatigue analysis and the size of the bins is not yet standardized and is a topic of ongoing research (Papi and Bianchini, 2024). With a fast surrogate model, however, it is possible to account for every single observation in the previous years, without the need to lump probabilities or limit the number of variables. The joint probabilities of the sea states are, therefore, automatically accounted for.

In this section, we use the validated surrogate model from Section 4.2 to make probabilistic estimates of the equivalent loads ( $M_{\text{eq}}$ ) for 10 million reference load cycles on the floating wind turbine structure. The site data is obtained from the ERA5

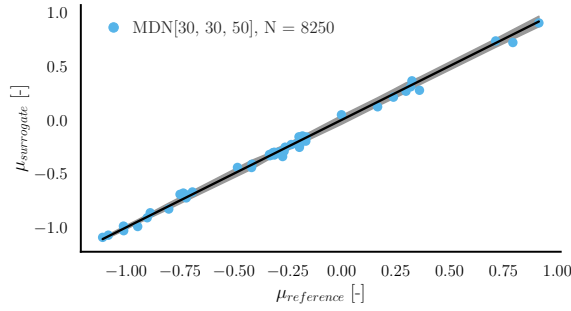

(a) Prediction of the mean DEL

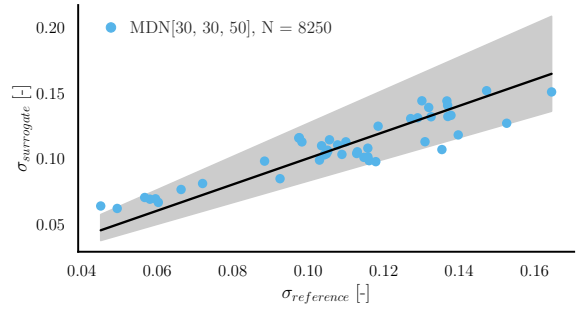

(b) Prediction of the standard deviation of the DEL

**Figure 13.** Load predictions using MDN for the blade root flapwise DEL (normalized). Figure (a) shows the surrogate predicted conditional mean at the test locations vs. the conditional mean calculated using BHawC. Figure (b) shows the predicted and reference standard deviations of the conditional pdf.

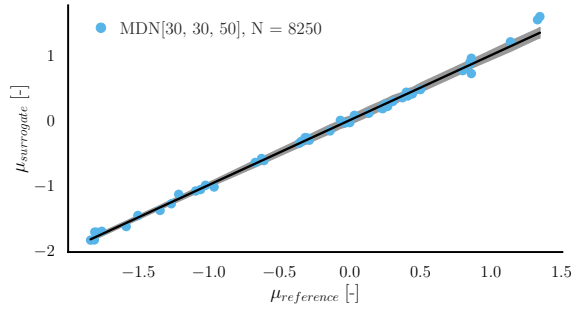

(a) Prediction of the mean DEL

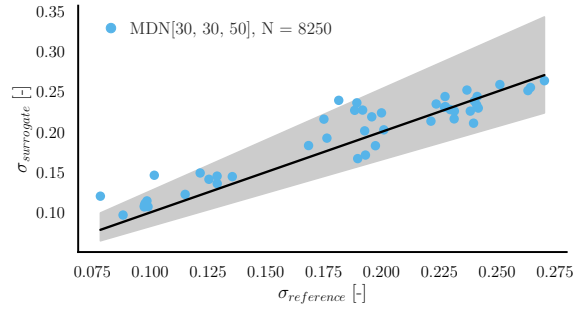

(b) Prediction of the standard deviation of the DEL

**Figure 14.** Load predictions using MDN for the blade root edgewise DEL (normalized). Figure (a) shows the surrogate predicted conditional mean at the test locations vs. the conditional mean calculated using BHawC. Figure (b) shows the predicted and reference standard deviations of the conditional pdf.

database for four sites with an approximate water depth of 100 m, namely Sud de la Bretagne II, Emerald, Hywind Scotland and HIP Atlantic (Table A1). Figure 15 provides an overview of the site conditions observed at the four selected sites. For simplicity, the foundation and mooring line design are assumed to be the same across the four sites. It is assumed that the difference in the load distributions between the design in use and the site-optimized foundation will not be significant. The ERA5 hourly conditions are converted to 10-minute inputs by repeating each set of values six times. An alternative approach could be to draw the 10-minute values from a normal distribution with the hourly values [asa](#) the mean and an assumed standard deviation. The observations below cut-in and above the cut-out wind speed are excluded from the calculations. The site data consists of the average wind speed at 100m, significant wave height, peak spectral period, wind-wave misalignment (converted

765 to wave direction in OrcaFlex coordinates) and the shear exponent. The yaw misalignment values are sampled from a normal distribution with zero mean and a standard deviation of  $2^\circ$ . The turbulence intensity is calculated for each case based on the wind speed, assuming the IEC 61400-1 turbulence class C classification.

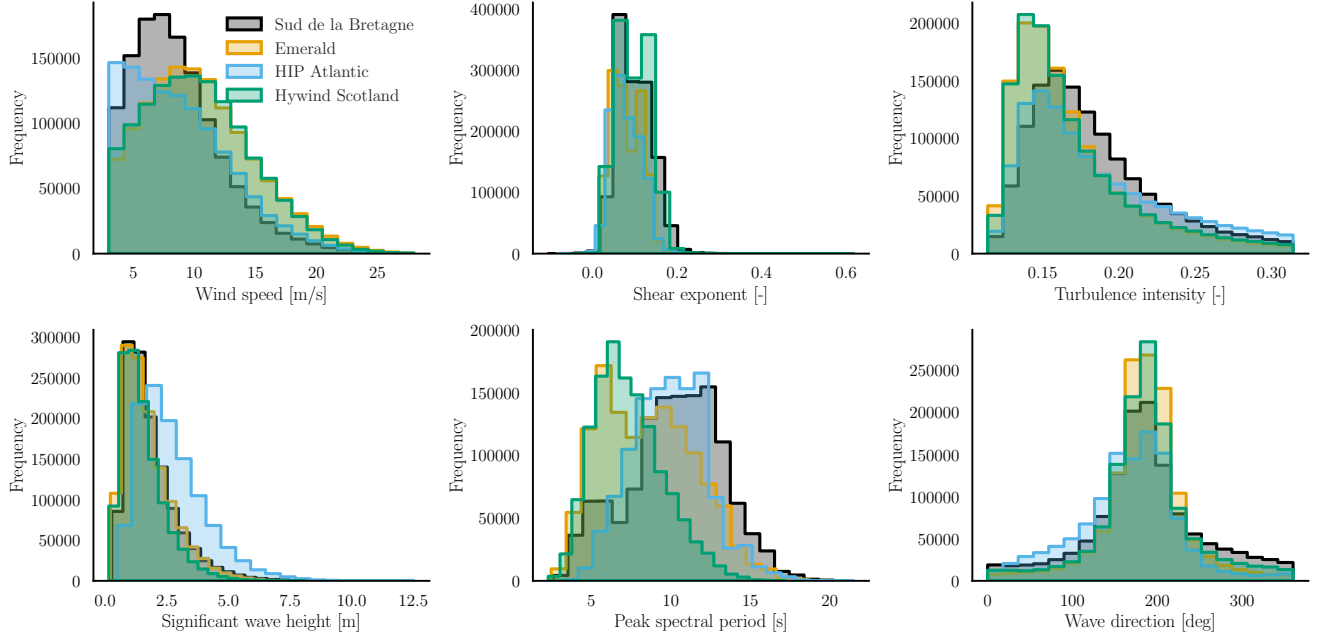

**Figure 15.** Comparison of the site conditions at the four floating wind sites considered in this study (Table A1).

The value  $M_{eq}$  represents the cyclic load amplitude which produces the equivalent lifetime damage given  $n_{eq}$  cycles of oscillation over  $L = 25$  years. In Equation (11),  $M_i$  is the DEL for the  $i^{th}$  10-minutes of operation,  $n_{ref}$  is the reference number of cycles per 10-minutes, set to 600.  $m$  is the Wöhler coefficient, with part-specific values listed in Section 2.3.  $n_L$  is the number of 10-minute periods in  $L$  years. The loads do not have to be scaled as the probability of occurrence of each condition is equal. Since the surrogate has been validated in previous sections, we assume here that its predictions are accurate, and we can treat each  $M_i$  as a probabilistic output from the MDN model. From each  $M_i$  pdf, we draw 500 samples, resulting in a probabilistic estimation of  $M_{eq}$ .  $M_{eq}$  is defined as,

$$775 \quad M_{eq} = \left( \frac{n_{ref}}{n_{eq}} \sum_{i=1}^{n_L} M_i^m \right)^{1/m} \quad (11)$$

where  $n_{eq}$  is  $10^6$  and  $n_{ref}$  is fixed to 600 oscillations per 10 minute period. The probabilistic  $M_{eq}$  value can be further used to calculate the stress reserve factor when re-designing the tower, or to calculate the fatigue damage during the structure's operating lifetime.

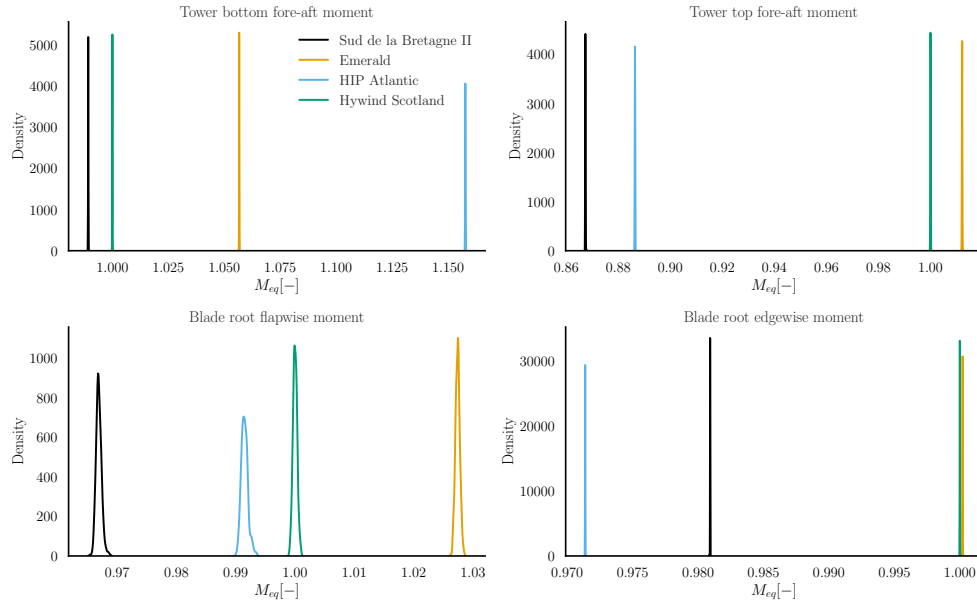

**Figure 16.** The 25-year normalized  $M_{eq}$  calculated for four sites at the tower bottom fore-aft direction (top-left), tower top fore-aft (top-right), blade root flapwise (bottom-left) and blade root edgewise (bottom-right) channels. The mean  $M_{eq}$  obtained at the Hywind Scotland site is used as the reference to normalize the loads at the remaining locations.

Figure 16 shows the kernel density estimate of the normalized  $M_{eq}$  values from the surrogate for the four selected sites.  $M_{eq}$  has been normalized by the average of the predicted  $M_{eq}$  values at the Hywind Scotland site for every channel. Firstly, it is interesting to note that the uncertainty in  $M_{eq}$  at each site is very small compared to the mean. This aligns with the law of large numbers, which states that for  $M_i$  with a mean  $\mu$  and variance  $\sigma^2$ , the standard deviation of the average of the distribution of  $(\sum M_i)$  decreases as  $\sigma/\sqrt{n_L}$ . Since  $n_L$  is in the order of  $10^6$ , the standard deviation becomes extremely small as we get closer to the true mean. Even though the effect of  $M_i$  being raised to the power of  $m$  means that any variability in the sum is amplified, subsequently taking the  $m^{th}$  root has the opposite, damping effect. Therefore, the effect of the outliers is essentially nullified due to the averaging. It is important to note that this study considers only the statistical uncertainty arising from stochastic input sources. In practice, other sources of uncertainty may contribute to the analysis (IEC, 2024b). For example, uncertainties related to the underlying joint distribution of site conditions represent another significant source of variability. Including these additional sources of uncertainties may introduce bias in the long-term mean, which is reflected as an uncertainty in the aggregated statistics of the outputs. Including these additional uncertainties in the feature set would likely increase the variance of the final load estimates.<sup>DS</sup>

Secondly, the loads on different channels do not scale uniformly across sites. At the HIP Atlantic site, for instance, the cumulative tower bottom fore-aft moment is the highest, as shown in Figure 16. This is primarily due to the influence of the significant wave height, which is expected to have a larger impact on the tower bottom fatigue (Singh et al., 2024c; Wiley

795 et al., 2023; Edwards et al., 2023). The marginal distribution of significant wave height at this site shows a higher probability of larger waves compared to other locations, supporting the observed increase in tower bottom loads.

The distributions of wind speed, turbulence intensity, and significant wave height at the Emerald and Hywind Scotland sites (Figure 15) are nearly identical. This results in comparable tower top fore-aft and blade root edgewise damage. However, there remains a significant difference in blade root flapwise fatigue accumulation. This result is surprising, given that the loads at  
800 this location are primarily wind-driven. Nevertheless, it underscores the complexity of fatigue damage accumulation, which can yield different outcomes with minor variations in site conditions even with respect to non-dominant variables.

## 5 Conclusions

### 5.1 Summary

This paper presents a framework to develop probabilistic surrogate models for predicting floating offshore wind turbine fatigue  
805 loads for site analysis. The surrogate maps the environmental conditions from potential farm sites to the 10-minute damage equivalent loads experienced by a spar-type floating wind turbine. The main advantage of using probabilistic surrogates for this application is the ability to estimate conditional statistics with high accuracy to account for the statistical uncertainty resulting from the stochastic site conditions while minimizing the computational cost of training by avoiding seed repetitions. Based on the reanalysis data from the ERA5 database for several comparable floating sites, the surrogate model is used to propagate the  
810 statistical uncertainties to the 25-year fatigue loads on the wind turbine.

In this study, the analysis is performed on a spar-buoy floating foundation based on a modified Hywind-Scotland 6MW wind turbine. The damage equivalent loads are considered on critical locations on the tower and blades and are calculated using a coupled implementation of BHawC/OrcaFlex for training and validating the surrogate. The features characterizing a floating farm site and the appropriate ranges are defined. The probabilistic model considered in this study is the mixture density  
815 network, as it is flexible, robust, and interpretable, and has performed well for fixed bottom load emulation in the literature.

Since MDN is based on a neural network parametrization, several hyperparameters require tuning prior to training. Therefore, a hyperparameter study is performed to find the appropriate neural network layout ~~and the minimum number of training samples required to reach a high accuracy in terms of  $R^2\mu$  and  $d_{W2}$  and the number of training samples to maximize the prediction accuracy of the MDN surrogate model<sup>DS</sup>~~. The conditional distribution predicted by the chosen model is validated  
820 on a set of 47 operating conditions, each simulated with 44 random seeds in BHawC/Orcaflex to obtain a reference conditional distribution for each test case. The  $R^2$  value for estimating the conditional mean is  $> 0.99$  on all channels with the surrogate, indicating an excellent fit. The standard deviation of the conditional distribution is over-predicted by the model in the case of the tower bottom fore-aft moment, but within the range of uncertainty bounds for the tower top and blade root channels.

Finally, the validated surrogate model is used to make probabilistic estimates of the 25-year equivalent damage on the tower  
825 and blades for four different sites. Since the surrogate model is fast, load predictions can be made quickly on all observed site conditions without lumping or binning the sea states a priori. ~~The uncertainty in the aggregated lifetime fatigue loads due to statistical variance in the inputs is found to be much smaller in scale compared to the mean. This results from summing the~~

~~10-minute DELs over a million occurrences, effectively nullifying the impact of the outliers.~~<sup>DS</sup> We demonstrate that surrogate models can be powerful tools for site analysis, especially for floating wind turbines, where the choice of variables and binning methods is still an open question. Additionally, using probabilistic surrogates like MDNs helps reduce bias in calculating the aggregate mean fatigue, as the conditional distributions are not always normally distributed.

## 5.2 Discussion and future work

This section provides a critical discussion of the study's results, along with practical considerations and limitations associated with the use of MDNs.<sup>DS</sup>

### 5.2.1 10-minute conditional DEL prediction

Given the stochastic nature of the site conditions, it is natural to model the 10-minute DEL response within a probabilistic framework. MDN is demonstrated in this study to be a reliable tool for modeling the conditional distribution of 10-minute DELs on the spar buoy floating wind turbine's tower and blades. MDN predictions are shown to remain robust across different network architectures and numbers of mixture components. The conditional means of the DELs are predicted with high accuracy, achieving an  $R^2 = 0.99$ . Additionally, the Wasserstein distance between the predicted and reference conditional distributions shows a strong match at the blade roots and tower top. However, at the tower bottom, the conditional standard deviation of the 10-minute fore-aft DEL is consistently over-predicted. It is corroborated by the relatively larger normalized Wasserstein distance value, indicating a bigger difference between the reference and predicted pdfs. Two main factors contribute to this: (i) the reference BHawC distributions are not converged at all simulated test locations with 44 random seeds. The tails of some distributions are not developed, resulting in short-tailed distributions that the MDN cannot easily capture; and (ii) the tower bottom fatigue is shown in the literature to have a stronger correlation to the hydrodynamic parameters, leading to higher noise in the data. As MDN is trained to minimize the negative log-likelihood, it is rewarded for predicting higher variance when there is less confidence.<sup>DS</sup>

### 5.2.2 Probabilistic lifetime DEL aggregation

The uncertainty in the aggregated lifetime fatigue loads due to stochastic inputs is found to be much smaller in scale compared to the mean. This results from summing the 10-minute DELs over a million occurrences, effectively nullifying the impact of the outliers. The use of a probabilistic surrogate that correctly captures the conditional distribution is still useful, as it minimizes the aggregation of error in the final response.<sup>DS</sup>

### 5.2.3 Notes on mixture density networks

Mixture density networks, due to their flexibility in modeling the conditional response, are well-suited for the problem of probabilistic load estimation. One big advantage of the method is the ease of implementation and robustness, as demonstrated in this paper. Compared to deterministic models that often assume a Gaussian response to determine the conditional mean,

mixture models can account for skewness and multimodality, and improve the mean estimates. This is especially important for quantities like DELs, which may have non-Gaussian, heteroscedastic variations. MDNs scale well and are cost-effective to train compared to models that use Bayesian inference or variational inference (Blei et al., 2017).<sup>DS</sup>

MDNs without regularization can result in overfitting. Therefore, in this study, both L1 and L2 regularization are implemented. Secondly, MDNs rely on a stochastic optimizer that is sensitive to the initialization of the model parameters. Hence, a 10-fold cross-validation is recommended to ensure the optimizer is not stuck on a false minimum. As seen in the tower-bottom fore-aft channel, minimizing the negative log-likelihood can result in the over-prediction of the standard deviation of the conditional response when the underlying distribution is short-tailed. MDNs here are not restricted to strictly positive values; in some cases, the tails may also extend to negative values. A potential solution is to assume a lognormal distribution for the output. This can be done by directly predicting the parameters of a lognormal distribution during training or by transforming the output to a normal distribution before training.<sup>DS</sup>

#### 5.2.4 Future work

Future studies could use such surrogates to identify optimal methods for grouping sea states in order to reduce the number of physics-based simulations required to achieve the same lifetime fatigue loads as using all observed site data. This type of analysis would be computationally impractical with an engineering tool, as it would require performing millions of simulations to establish a baseline reference. Surrogates offer an alternative for reducing the computational demands while maintaining accuracy. Surrogate models can also be used in this context to isolate combinations of sea states that produce the highest fatigue on the wind turbine structure. Furthermore, it is interesting to include other sources of uncertainty in the analysis of loads, such as introducing an uncertainty on the parameters defining the joint distribution of the site conditions<sup>DS</sup>. Once trained, probabilistic surrogate models can be used to propagate the different uncertainty sources to the loads to study the combined effect without additional costs. This approach opens new opportunities for integrating reliability-based decision-making into the design process.

#### 880 Appendix A: ERA5 locations used for defining feature ranges

Table A1 lists the locations used for defining the feature ranges in Section 2. The data is downloaded from the years 1979 to 2020. The database consists of the hourly average wind speeds at 10 m and 100 m, the significant wave height, spectral peak period, and wave direction. The shear law exponent is derived from the wind speed values assuming a power law profile for the atmospheric boundary layer.

#### 885 Appendix B: Feature bounds

##### B1 Significant wave height

The upper and lower limits for the significant wave height are defined as functions of the wind speed at hub height  $U_{ref}$ .



**Table A1.** Description of the sites used for defining the feature ranges.

| Site                                             | Location     |               | ERA5 approx. location |               |           |
|--------------------------------------------------|--------------|---------------|-----------------------|---------------|-----------|
|                                                  | Latitude [°] | Longitude [°] | Latitude [°]          | Longitude [°] | Depth [m] |
| Dyning (Creane et al., 2024)                     | 58.218       | 17.860        | 58.00                 | 17.75         | 141       |
| Mareld (Creane et al., 2024)                     | 58.161       | 10.575        | 58.25                 | 10.50         | 233       |
| Sørilige Nordsjø Phase II (Creane et al., 2024)  | 56.783       | 4.918         | 56.75                 | 5.00          | 60        |
| Tetraspar                                        | 59.15        | 5.013         | 59.00                 | 5.00          | 200       |
| Utsira Nord Phase I (Creane et al., 2024)        | 59.276       | 4.540         | 59.00                 | 4.50          | 273       |
| Buchanan Deep (Equinor ASA, 2014)                | 57.45        | −1.31         | 57.50                 | −1.25         | 100       |
| West of Barra (Vigara et al., 2019)              | 56.885       | −7.947        | 57.00                 | −7.75         | 100       |
| Gran Canaria (Vigara et al., 2019)               | 27.75        | −15.33        | 27.75                 | −15.00        | 200       |
| Morro Bay (Vigara et al., 2019)                  | 35.083       | −121.5        | 35.5                  | −121.75       | 870       |
| Sud de la Bretagne II (Creane et al., 2024)      | 47.3247      | -3.6594       | 47                    | -3.7          | 94        |
| Emerald (Creane et al., 2024; Wind, 2025)        | 51.3565      | -8.0761       | 51.5                  | -8            | 90        |
| Moneypoint Offshore I (Creane et al., 2024; ESB) | 52.519       | -10.276       | 52.5                  | -10.5         | 102       |
| HIP Atlantic (Creane et al., 2024)               | 63.6325      | -16.3756      | 63.5                  | -16.5         | 98        |

The upper limit is a quadratic function of the form:

$$H_{s_U} = -0.008U_{ref}^2 + 0.45U_{ref} + 5 \quad (B1)$$

890 The lower limit is defined as:

$$H_{s_L} = 0.719e^{(0.0832U_{ref})} - e^{(0.04U_{ref})} \quad (B2)$$

## B2 Peak spectral period

The peak spectral period range is designed to be a function of the significant wave height (which is in turn, a function of the wind speed at hub height). We define scaling functions  $A$ ,  $B$  and  $C$  as,

$$895 \quad A = a_1 + a_2H_s^{a_3} \quad (B3)$$

$$B = b_1 + b_2e^{-b_3H_s} \quad (B4)$$

$$C = c_1 + c_2e^{-c_3H_s} \quad (B5)$$

The scaling functions are used to define the upper bound  $T_{p_U}$  and lower bound  $T_{p_L}$  as,

$$T_{p_\mu} = e^{(A+0.5B)} \quad (\text{B6})$$

$$900 \quad T_{p_L} = T_{p_\mu} (1 - 3 \times \sqrt{(e^B - 1)}) \quad (\text{B7})$$

$$T_{p_U} = T_{p_\mu} (1 + 3 \times \sqrt{(e^C - 1)}) \quad (\text{B8})$$

The coefficients used to fit the curve in this study are listed in Table B1.

| $a_1$ | $a_2$ | $a_3$ | $b_1$ | $b_2$ | $b_3$ | $c_1$ | $c_2$ | $c_3$ |
|-------|-------|-------|-------|-------|-------|-------|-------|-------|
| 1.3   | 0.57  | 0.37  | 0.005 | 0.1   | 0.43  | 0.005 | 0.75  | 0.6   |

**Table B1.** Tuning coefficients for defining the range functions for the spectral wave period.

## Appendix C: Choice of hyperparameters

### C1 Number of layers and nodes

905 Large networks are better at capturing complex expressions in data but are susceptible to overfitting with a small training set. The objective of this study is first, to observe the robustness of the model relative to the number of network parameters for a particular training data size. And second, to choose a network architecture suitable for the rest of the study.

A sensitivity study on the number of nodes and layers is performed in this section for a training dataset of 8250 samples. The number of mixture parameters is 4 in all cases, and the rest of the network hyperparameters are fixed to the values listed  
910 in Table 6. Networks with 2, 3, and 4 layers with various widths are tested. The x-axis in Figure C1 lists the combinations of widths per layer evaluated in this study. The tower bottom fore-aft DEL channel is chosen for this study.

The  $R^2$  values of the DEL are notably good for the architectures tested, indicating good model robustness. The main differences observed are in  $d_{W2}$ , where the large 3 or 4-layer networks are generally better at capturing the complete conditional pdf. For the remainder of this study, we chose a 3-layer network with 30 nodes in layer 1, 30 nodes in layer 2, and 50 nodes in  
915 layer 3 in combination with 8250 training samples.

### C2 Number of mixture elements

The number of Gaussian distributions in the mixture controls the complexity of the predicted conditional pdf. However, a large number of unnecessary mixture elements add redundancy and increase the computational complexity of the surrogate. In this section, we use 6250 and 8250 training samples with a 3-layer architecture width = (30, 30, 50) and test the performance of 4,  
920 12, and 20 mixture elements on the tower bottom fore-aft DEL channel.

The number of components does not affect the estimation of the tower bottom fore-aft DEL mean. A slight improvement can be seen in Figure C2b with four components. The model, therefore, appears to be robust regarding the choice of the number of

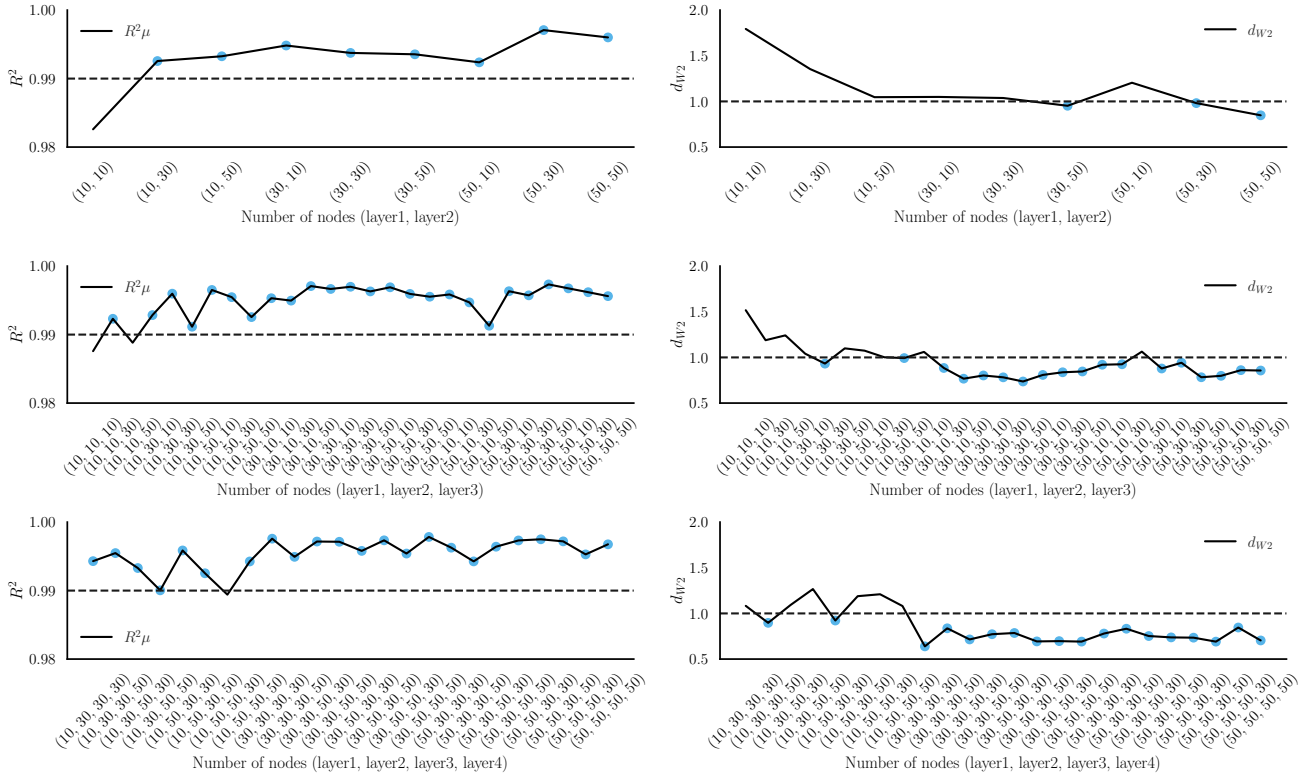

**Figure C1.** Study on the network architecture. The x-axis reflects the number of nodes per layer. The rows correspond to 2, 3, and 4-layer networks. The left column shows the  $R^2$  value for the mean of the conditional pdf of the tower bottom fore-aft DEL channel. The dashed line corresponds to an  $R^2$  value of 0.99. The right column plots the  $d_{W2}$  values for the same channel with the dashed line corresponding to  $d_{W2}$  of 1.

mixture components. In other words, it does not necessarily benefit from a large set of mixture components. MDN models in the remainder of the study are trained with four kernels.

925 **Author contributions.** **Deepali Singh:** Conceptualization, Methodology, Software, Validation, Data curation, Investigation, Writing - original draft, Visualization. **Erik Haugen:** Conceptualization, Software, Data curation, Supervision, Methodology, Writing - review & editing. **Kasper Laugesen:** Conceptualization, Software, Supervision, Methodology, Writing - review & editing, Project administration. **Richard P. Dwight:** Conceptualization, Supervision, Methodology, Writing - review & editing, Project administration. **Axelle Viré:** Supervision, Writing - review & editing, Project administration, Funding acquisition.

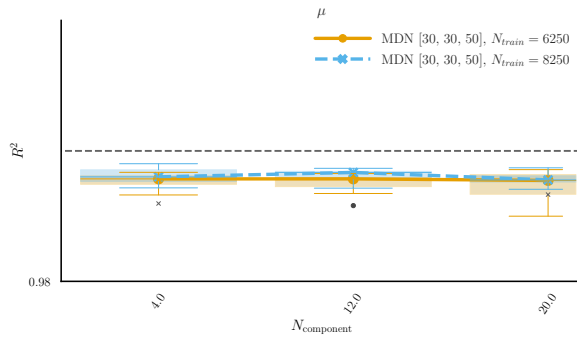

(a)  $R^2$  values for the predicted mean

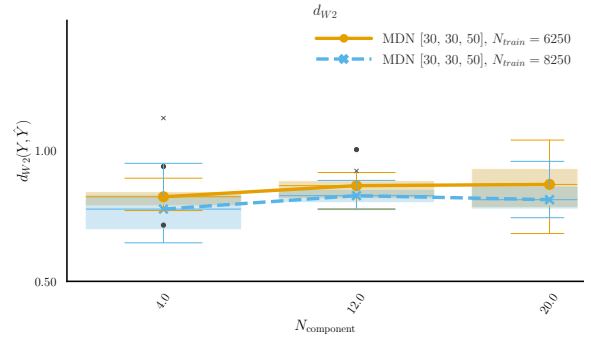

(b)  $d_{W2}$  for the predicted conditional pdf

**Figure C2.** Sensitivity of the MDN surrogate to the number of mixture components.

930 *Competing interests.* The authors declare that they have no known competing financial interests or personal relationships that could have appeared to influence the work reported in this paper.

*Acknowledgements.* The project has received funding from the European Union's Horizon 2020 research and innovation programme under grant agreement No. 860737 (STEP4WIND project, step4wind.eu). The authors would like to thank Dr. Herman Frederik Veldkamp for his valuable insights and expert recommendations.

- Simulation-Length Requirements in the Loads Analysis of Offshore Floating Wind Turbines, vol. Volume 8: Ocean Renewable Energy of *International Conference on Offshore Mechanics and Arctic Engineering*, <https://doi.org/10.1115/OMAE2013-11397>, 2013.
- Abdallah, I., Lataniotis, C., and Sudret, B.: Parametric hierarchical kriging for multi-fidelity aero-servo-elastic simulators —Application to extreme loads on wind turbines, *Probabilistic Engineering Mechanics*, 55, 67–77, <https://doi.org/https://doi.org/10.1016/j.pro bengmech.2018.10.001>, 2019.
- 940 Arramounet, V., Winter, C. E., Maljaars, N., Girardin, S., and Robic, H.: Development of coupling module between BHawC aeroelastic software and OrcaFlex for coupled dynamic analysis of floating wind turbines, *Journal of Physics: Conference Series*, 1356, 1–15, <https://doi.org/10.1088/1742-6596/1356/1/012007>, 2019.
- Avendaño-Valencia, L. D., Abdallah, I., and Chatzi, E.: Virtual fatigue diagnostics of wake-affected wind turbine via Gaussian Process Regression, *Renewable Energy*, 170, 539–561, <https://doi.org/10.1016/j.renene.2021.02.003>, 2021.
- 945 Bishop, C. M.: Mixture density networks, Tech. rep., Aston University, ISBN NCRG/94/004, 1994.
- Björck, A.: AERFORCE: Subroutine Package for unsteady Blade-Element/Momentum Calculations, Tech. rep., Flygtekniska Försörskanstalten, Bromma, Sweden, 2000.
- Blei, D. M., Kucukelbir, A., and McAuliffe, J. D.: Variational Inference: A Review for Statisticians, *Journal of the American Statistical Association*, 112, 859–877, <https://doi.org/10.1080/01621459.2017.1285773>, 2017.
- 950 Bussemakers, M. P. J.: Validation of aero-hydro-servo-elastic load and motion simulations in BHawC/OrcaFlex for the Hywind Scotland floating offshore wind farm, Tech. Rep. July, Delft University of Technology, <http://repository.tudelft.nl/>, 2020.
- Couturier, P. J. and Skjoldan, P. F.: Implementation of an advanced beam model in BHawC, *Journal of Physics: Conference Series*, 1037, 0–10, <https://doi.org/10.1088/1742-6596/1037/6/062015>, 2018.
- 955 Creane, S., Santos, P., Kölle, K., Airoldi, D., Bakhoday-Paskyabi, M., Biglu, M., Brown, W., Cheynet, E., Ecenarro Diaz-Tejeiro, L., Frøyd, L., et al.: IEA Wind TCP Task 49: Reference Site Conditions for Floating Wind Arrays, Tech. rep., National Renewable Energy Laboratory (NREL), Golden, CO (United States), <https://doi.org/10.2172/2447928>, 2024.
- Dimitrov, N., Kelly, M. C., Vignaroli, A., and Berg, J.: From wind to loads: Wind turbine site-specific load estimation with surrogate models trained on high-fidelity load databases, *Wind Energy Science*, 3, 767–790, <https://doi.org/10.5194/wes-3-767-2018>, 2018a.
- 960 Dimitrov, N., Kelly, M. C., Vignaroli, A., and Berg, J.: From wind to loads: Wind turbine site-specific load estimation with surrogate models trained on high-fidelity load databases, *Wind Energ. Sci.*, 3, 767–790, <https://doi.org/10.5194/wes-3-767-2018>, 2018b.
- Edwards, E. C., Holcombe, A., Brown, S., Ransley, E., Hann, M., and Greaves, D.: Evolution of floating offshore wind platforms: A review of at-sea devices, *Renewable and Sustainable Energy Reviews*, 183, <https://doi.org/10.1016/j.rser.2023.113416>, 2023.
- Equinor: Hywind Scotland The world’s first commercial floating wind farm, <https://www.equinor.com/content/dam/statoil/documents/newsroom-additional-documents/news-attachments/brochure-hywind-a4.pdf>, [Accessed 18-10-2024], 2024.
- 965 Equinor ASA: Hywind Buchan Deep Metocean Design Basis RE2014-002, Tech. rep., Equinor ASA, Scotland, <https://marine.gov.scot/data/hywind-scotland-pilot-park-05515150-supporting-studies>, 2014.
- Equinor ASA: Hywind Scotland Pilot Park Decommissioning Programme, Tech. rep., Equinor ASA, Scotland, <https://marine.gov.scot/data/decommissioning-programme-hywind-scotland-pilot-park>, 2022.
- 970 ESB: Moneypoint Offshore Wind Project — [marine-ireland.ie](https://marine-ireland.ie), <https://marine-ireland.ie/node/396>, [Accessed 11-02-2025].

- Gasparis, G., Lio, W. H., and Meng, F.: Surrogate Models for Wind Turbine Electrical Power and Fatigue Loads in Wind Farm, *Energies*, 13, 6360, <https://doi.org/10.3390/en13236360>, 2020.
- Hlaing, N., Morato, P. G., de Nolasco Santos, F., Weijtjens, W., Devriendt, C., and Rigo, P.: Farm-wide virtual load monitoring for offshore wind structures via Bayesian neural networks, *Structural Health Monitoring*, 23, 1641–1663, <https://doi.org/10.1177/14759217231186048>, 2024.
- Hübler, C., Gebhardt, C. G., and Rolfes, R.: Hierarchical four-step global sensitivity analysis of offshore wind turbines based on aeroelastic time domain simulations, *Renewable Energy*, 111, 878–891, <https://doi.org/10.1016/j.renene.2017.05.013>, 2017.
- IEC: 61400-1 Ed.3 Wind turbines - Design requirements, Tech. rep., IEC, ISBN 9782889122011, 2010.
- IEC: TS 61400-3-2:2019, Tech. rep., IEC, ISBN 9782832276099, 2024a.
- 980 IEC: TS 61400-9 ED1: Wind energy generation systems – Part 9: Probabilistic design measures for wind turbines, Tech. rep., IEC, 2024b.
- Jonkman, J.: The New Modularization Framework for the FAST Wind Turbine CAE Tool, in: 51st AIAA Aerospace Sciences Meeting including the New Horizons Forum and Aerospace Exposition, AIAA, Grapevine, 2013.
- Kingma, D. P. and Ba, J.: Adam: A Method for Stochastic Optimization, 2017.
- Larsen, T. and Hansen, A.: How 2 HAWC2, the user’s manual, no. 1597(ver. 3-1)(EN) in Denmark. Forskningscenter Risø. Risø-R, Risø National Laboratory, ISBN 978-87-550-3583-6, 2007.
- 985 Li, X. and Zhang, W.: Probabilistic fatigue evaluation of floating wind turbine using combination of surrogate model and copula model, AIAA Scitech 2019 Forum, <https://doi.org/10.2514/6.2019-0247>, 2019a.
- Li, X. and Zhang, W.: Probabilistic fatigue evaluation of floating wind turbine using combination of surrogate model and Copula model, AIAA, <https://doi.org/10.2514/6.2019-0247>, 2019b.
- 990 Li, X. and Zhang, W.: Long-term fatigue damage assessment for a floating offshore wind turbine under realistic environmental conditions, *Renewable Energy*, 159, 570–584, <https://doi.org/10.1016/j.renene.2020.06.043>, 2020.
- Lin, Z., Liu, X., and Lotfian, S.: Impacts of water depth increase on offshore floating wind turbine dynamics, *Ocean Engineering*, 224, 108697, <https://doi.org/10.1016/j.oceaneng.2021.108697>, 2021.
- Mann, J.: Wind field simulation, *Probabilistic Engineering Mechanics*, 13, 269–282, [https://doi.org/10.1016/s0266-8920\(97\)00036-2](https://doi.org/10.1016/s0266-8920(97)00036-2), 1998.
- 995 Masciola, M., Robertson, A., Jonkman, J., and Driscoll, F.: Investigation of a FAST-OrcaFlex Coupling Module for Integrating Turbine and Mooring Dynamics of Offshore Floating Wind Turbines: Preprint, in: International Conference on Offshore Wind Energy and Ocean Energy, National Renewable Energy Lab. (NREL), Golden, CO (United States), <https://www.osti.gov/biblio/1029021>, 2011.
- Matsuishi, M. and Endo, T.: Fatigue of metals subjected to varying stress, Japan Society of Mechanical Engineers, Fukuoka, Japan, 68, 37–40, 1968.
- 1000 Montavon, G., Orr, G. B., and Müller, K.-R., eds.: Neural networks: Tricks of the trade, Springer Berlin, Heidelberg, 2 edn., ISBN 978-3-642-35288-1, <https://doi.org/10.1007/978-3-642-35289-8>, 2012.
- Murcia, J. P., Réthoré, P. E., Dimitrov, N., Natarajan, A., Sørensen, J. D., Graf, P., and Kim, T.: Uncertainty propagation through an aeroelastic wind turbine model using polynomial surrogates, *Renewable Energy*, 119, 910–922, <https://doi.org/10.1016/j.renene.2017.07.070>, 2018.
- Ng, A. Y.: Feature Selection, L1 vs. L2 Regularization, and Rotational Invariance, in: Proceedings of the Twenty-First International Conference on Machine Learning, ICML ’04, p. 78, Association for Computing Machinery, New York, NY, USA, ISBN 1581138385, <https://doi.org/10.1145/1015330.1015435>, 2004.
- NREL: OpenFAST/openfast: Main repository for the NREL-supported OpenFAST whole-turbine and FAST.Farm wind farm simulation codes., <https://github.com/OpenFAST/openfast>, accessed: 2022-09-29, 2022.

- Omole, J., Schlipf, D., Venu, A., and Ludde, M.: Bayesian neural network model for estimating fatigue loads on wind turbines, <https://doi.org/10.5281/zenodo.4923193>, presentation at Wind Energy Science Conference, 2021.
- Papi, F. and Bianchini, A.: A New Perspective on Offshore Wind Turbine Certification Using High Performance Computing, *Journal of Physics: Conference Series*, 2767, 052 008, <https://doi.org/10.1088/1742-6596/2767/5/052008>, 2024.
- Peyré, G. and Cuturi, M.: Computational optimal transport: With applications to data Science, *Foundations and Trends in Machine Learning*, 11, 355–607, <https://doi.org/10.1561/22000000073>, 2019.
- Ramdas, A., Garcia, N., and Cuturi, M.: On Wasserstein two sample testing and related families of nonparametric tests, <https://doi.org/10.48550/arxiv.1509.02237>, 2015.
- Rasmussen, C. E. and Williams, C. K. I.: *Gaussian processes for machine learning*, Adaptive computation and machine learning, MIT Press, Cambridge, Mass., 2006.
- Reddy, L. R., Karystinou, D., Milano, D., Walker, J., and Viré, A.: Influence of wind-wave characteristics on floating wind turbine loads: A sensitivity analysis across different floating concepts, *Journal of Physics: Conference Series*, 2767, 062 030, <https://doi.org/10.1088/1742-6596/2767/6/062030>, 2024.
- Robertson, A. N., Sethuraman, L., Jonkman, J., and Quick, J.: Assessment of Wind Parameter Sensitivity on Extreme and Fatigue Wind Turbine Loads, in: *Wind Energy Symposium*, National Renewable Energy Laboratory (NREL), Golden, CO (United States), New York, NY: American Institute of Aeronautics and Astronautics, Inc. (AIAA), <https://doi.org/10.2514/6.2018-1728>, 2018.
- Robertson, A. N., Shaler, K., Sethuraman, L., and Jonkman, J.: Sensitivity analysis of the effect of wind characteristics and turbine properties on wind turbine loads, *Wind Energy Science*, 4, 479–513, <https://doi.org/10.5194/wes-4-479-2019>, 2019.
- Rouaud, M.: *Probability, statistics and estimation. Propagation of Uncertainties*, Self-published, 2013.
- Rubak, R. and Petersen, J.: Monopile as part of aeroelastic wind turbine simulation code, *Proceedings of Copenhagen Off-shore Wind*, pp. 1–10, [http://wind.nrel.gov/public/SeaCon/Proceedings/Copenhagen.Offshore.Wind.2005/documents/papers/Design\\_calculations\\_and\\_risks/R.Rubak\\_Monopile\\_as\\_Part\\_of\\_Aeroelastic\\_WindTurbineSim.pdf](http://wind.nrel.gov/public/SeaCon/Proceedings/Copenhagen.Offshore.Wind.2005/documents/papers/Design_calculations_and_risks/R.Rubak_Monopile_as_Part_of_Aeroelastic_WindTurbineSim.pdf), 2005.
- Shaler, K., Robertson, A., and Jonkman, J.: Sensitivity Analysis of Turbine Fatigue and Ultimate Loads to Wind and Wake Characteristics in a Small Wind Farm, *Wind Energy Science*, 8, 25–40, <https://doi.org/10.5194/wes-8-25-2023>, 2023.
- Singh, D., Dwight, R. P., Laugesen, K., Beaudet, L., and Viré, A.: Probabilistic surrogate modeling of offshore wind-turbine loads with chained Gaussian processes, *Journal of Physics: Conference Series*, 2265, 032 070, <https://doi.org/10.1088/1742-6596/2265/3/032070>, 2022.
- Singh, D., Dwight, R., and Viré, A.: Probabilistic surrogate modeling of damage equivalent loads on onshore and offshore wind turbines using mixture density networks, *Wind Energ. Sci. Discussions*, 2024, 1–28, <https://doi.org/10.5194/wes-2024-20>, 2024a.
- Singh, D., Dwight, R. P., and Vire, A.: Probabilistic surrogate modeling of damage equivalent loads on onshore and offshore wind turbines using mixture density networks, *WES Discussions*, pp. 1–28, <https://papers.ssrn.com/abstract=4354826>, 2024b.
- Singh, D., Haugen, E., Laugesen, K., Chauhan, A., and Viré, A.: Data analysis of the TetraSpar demonstrator measurements, *Journal of Physics: Conference Series*, 2767, 062 025, <https://doi.org/10.1088/1742-6596/2767/6/062025>, 2024c.
- Skjoldan, Peter Fisker: *Aeroelastic modal dynamics of wind turbines including anisotropic effects*, Ph.D. thesis, DTU, ISBN 9788755038486, 2011.
- Slot, R. M., Sørensen, J. D., Sudret, B., Svenningsen, L., and Thøgersen, M. L.: Surrogate model uncertainty in wind turbine reliability assessment, *Renewable Energy*, 151, 1150–1162, <https://doi.org/10.1016/j.renene.2019.11.101>, 2020.

- Sobol, I. M.: On the distribution of points in a cube and the approximate evaluation of integrals, *USSR Computational Mathematics and Mathematical Physics*, 7, 86–112, [https://doi.org/https://doi.org/10.1016/0041-5553\(67\)90144-9](https://doi.org/https://doi.org/10.1016/0041-5553(67)90144-9), 1967.
- Stewart, G., Lackner, M., Haid, L., Matha, D., Jonkman, J., and Robertson, A.: Assessing fatigue and ultimate load uncertainty in floating offshore wind turbines due to varying simulation length, *Safety, Reliability, Risk and Life-Cycle Performance of Structures and Infrastructures - Proceedings of the 11th International Conference on Structural Safety and Reliability, ICOSSAR 2013*, pp. 239–246, <https://doi.org/10.1201/b16387-33>, 2013.
- Teixeira, R., O'Connor, A., Nogal, M., Krishnan, N., and Nichols, J.: Analysis of the design of experiments of offshore wind turbine fatigue reliability design with Kriging surfaces, *Procedia Structural Integrity*, 5, 951–958, <https://doi.org/10.1016/j.prostr.2017.07.132>, 2017.
- Teixeira, R., O'Connor, A., and Nogal, M.: Probabilistic sensitivity analysis of offshore wind turbines using a transformed Kullback-Leibler divergence, *Structural Safety*, 81, 101 860, <https://doi.org/10.1016/j.strusafe.2019.03.007>, 2019.
- Torsethaugen, K. and Haver, S.: Simplified Double Peak Spectral Model For Ocean Waves, in: *International Ocean and Polar Engineering Conference*, 2004.
- Velarde, J., Kramhøft, C., and Sørensen, J. D.: Global sensitivity analysis of offshore wind turbine foundation fatigue loads, *Renewable Energy*, 140, 177–189, <https://doi.org/10.1016/j.renene.2019.03.055>, 2019.
- Vigara, F., Cerdan, L., Duran, R., Munoz, S., Lynch, M., Doole, S., Molins, C., Trubat, P., and Guanche, R.: COREWIND D1.2 Design Basis, Tech. rep., COREWIND, 2019.
- Villani, C.: The Wasserstein distances, in: *Optimal Transport: Old and New*, pp. 93–111, Springer Berlin Heidelberg, Berlin, Heidelberg, ISBN 978-3-540-71050-9, [https://doi.org/10.1007/978-3-540-71050-9\\_6](https://doi.org/10.1007/978-3-540-71050-9_6), 2009.
- Wang, Y., Lu, Q., Yao, T., Yin, T., Zhao, Y., Han, Z., Xu, Y., and Jiang, Z.: Global sensitivity analysis of a semi-submersible floating wind turbine using a neural network fitting method, *Ocean Engineering*, 285, 1–14, <https://doi.org/10.1016/j.oceaneng.2023.115351>, 2023.
- Wiley, W., Jonkman, J., Robertson, A., and Shaler, K.: Sensitivity analysis of numerical modeling input parameters on floating offshore wind turbine loads, *Wind Energy Science*, 8, 1575–1595, <https://doi.org/10.5194/wes-8-1575-2023>, 2023.
- Wind, E. F.: The Emerald Project - Floating Offshore Wind Ireland — [emeraldfloatingwind.com](https://emeraldfloatingwind.com/), <https://emeraldfloatingwind.com/>, [Accessed 11-02-2025], 2025.
- Yao, Y., Rosasco, L., and Caponnetto, A.: On Early Stopping in Gradient Descent Learning, *Constructive Approximation*, 26, 289–315, <https://doi.org/10.1007/s00365-006-0663-2>, 2007.
- Zhu, X. and Sudret, B.: Replication-based emulation of the response distribution of stochastic simulators using generalized lambda distributions, *International Journal for Uncertainty Quantification*, 10, 249–275, <https://doi.org/10.1615/Int.J.UncertaintyQuantification.2020033029>, 2020.
- Zhu, X. and Sudret, B.: Emulation of Stochastic Simulators Using Generalized Lambda Models, *SIAM/ASA Journal on Uncertainty Quantification*, 9, 1345–1380, <https://doi.org/10.1137/20M1337302>, 2021.
